# Supplementary material for: Activity of Colocasia esculenta (Taro) Corms against Gastric Adenocarcinoma Cells: Chemical Study and Molecular Characterization
Source: MDPI journal article supplement (doi:10.3390/ijms25010252), 2023-12-23

S1.  $^1\text{H}$  NMR (600 MHz,  $\text{CD}_3\text{OD}$ ) of *lariciresinol-4-O- $\beta$ -D-glucopyranoside* (**1**)  
S2. HSQC (600 MHz,  $\text{CD}_3\text{OD}$ ) of *lariciresinol-4-O- $\beta$ -D-glucopyranoside* (**1**)  
S3.  $^1\text{H}$  NMR (600 MHz,  $\text{CD}_3\text{OD}$ ) of (+)-*lariciresinol-9-O- $\beta$ -D-glucopyranoside* (**2**)  
S4. HSQC (600 MHz,  $\text{CD}_3\text{OD}$ ) of (+)-*lariciresinol-9-O- $\beta$ -D-glucopyranoside* (**2**)  
S5.  $^1\text{H}$  NMR (600 MHz,  $\text{CD}_3\text{OD}$ ) of *byzantionoside B 9-O- $\alpha$ -L-rhamnopyranosyl-(1'' $\rightarrow$ 2')- $\beta$ -D-glucopyranoside* (**3**)  
S6. HSQC (600 MHz,  $\text{CD}_3\text{OD}$ ) of *byzantionoside B 9-O- $\alpha$ -L-rhamnopyranosyl-(1'' $\rightarrow$ 2')- $\beta$ -D-glucopyranoside* (**3**)  
S7. HMBC (600 MHz,  $\text{CD}_3\text{OD}$ ) of *byzantionoside B 9-O- $\alpha$ -L-rhamnopyranosyl-(1'' $\rightarrow$ 2')- $\beta$ -D-glucopyranoside* (**3**).  
S8.  $^1\text{H}$  NMR (600 MHz,  $\text{CD}_3\text{OD}$ ) of *byzantionoside B* (**4**)  
S9. HSQC (600 MHz,  $\text{CD}_3\text{OD}$ ) of *byzantionoside B* (**4**)  
S10. HMBC (600 MHz,  $\text{CD}_3\text{OD}$ ) of *byzantionoside B* (**4**)  
S11.  $^1\text{H}$  NMR (600 MHz,  $\text{CD}_3\text{OD}$ ) of *dehydrodiconiferyl alcohol-4-O- $\beta$ -D-glucopyranoside* (**5**)  
S12. HSQC (600 MHz,  $\text{CD}_3\text{OD}$ ) of *dehydrodiconiferyl alcohol-4-O- $\beta$ -D-glucopyranoside* (**5**)  
S13. HMBC (600 MHz,  $\text{CD}_3\text{OD}$ ) of *dehydrodiconiferyl alcohol-4-O- $\beta$ -D-glucopyranoside* (**5**)  
S14.  $^1\text{H}$  NMR (600 MHz,  $\text{CD}_3\text{OD}$ ) of (+)-*isolariciresinol* (**6**)  
S15. HSQC (600 MHz,  $\text{CD}_3\text{OD}$ ) of (+)-*isolariciresinol* (**6**)  
S16. HMBC (600 MHz,  $\text{CD}_3\text{OD}$ ) of (+)-*isolariciresinol* (**6**)  
S17.  $^1\text{H}$ - $^1\text{H}$ -COSY (600 MHz,  $\text{CD}_3\text{OD}$ ) of (+)-*isolariciresinol* (**6**)  
S18.  $^1\text{H}$  NMR (600 MHz,  $\text{CD}_3\text{OD}$ ) of *dehydrodiconiferyl alcohol-9-O- $\beta$ -D-glucopyranoside* (**7**)  
S19. HSQC (600 MHz,  $\text{CD}_3\text{OD}$ ) of *dehydrodiconiferyl alcohol-9-O- $\beta$ -D-glucopyranoside* (**7**)  
S20. HMBC (600 MHz,  $\text{CD}_3\text{OD}$ ) of *dehydrodiconiferyl alcohol-9-O- $\beta$ -D-glucopyranoside* (**7**)  
S21.  $^1\text{H}$ - $^1\text{H}$ -COSY (600 MHz,  $\text{CD}_3\text{OD}$ ) of *dehydrodiconiferyl alcohol-9-O- $\beta$ -D-glucopyranoside* (**7**)  
S22.  $^1\text{H}$  NMR (600 MHz,  $\text{CD}_3\text{OD}$ ) of *3,4,5-tri-O-methyl gallic acid* (**8**)  
S23. HSQC (600 MHz,  $\text{CD}_3\text{OD}$ ) of *3,4,5-tri-O-methyl gallic acid* (**8**)  
S24.  $^1\text{H}$  NMR (600 MHz,  $\text{CD}_3\text{OD}$ ) of (+)-*lariciresinol* (**9**)  
S25. HSQC (600 MHz,  $\text{CD}_3\text{OD}$ ) of (+)-*lariciresinol* (**9**)  
S26.  $^1\text{H}$  NMR (600 MHz,  $\text{CD}_3\text{OD}$ ) of *americanol A* (**10**)  
S27. HSQC (600 MHz,  $\text{CD}_3\text{OD}$ ) of *americanol A* (**10**)  
S28. HMBC (600 MHz,  $\text{CD}_3\text{OD}$ ) of *americanol A* (**10**)

S1.  $^1\text{H}$  NMR (600 MHz,  $\text{CD}_3\text{OD}$ ) of *lariciresinol-4-O-\beta*-D-glucopyranoside (**1**)

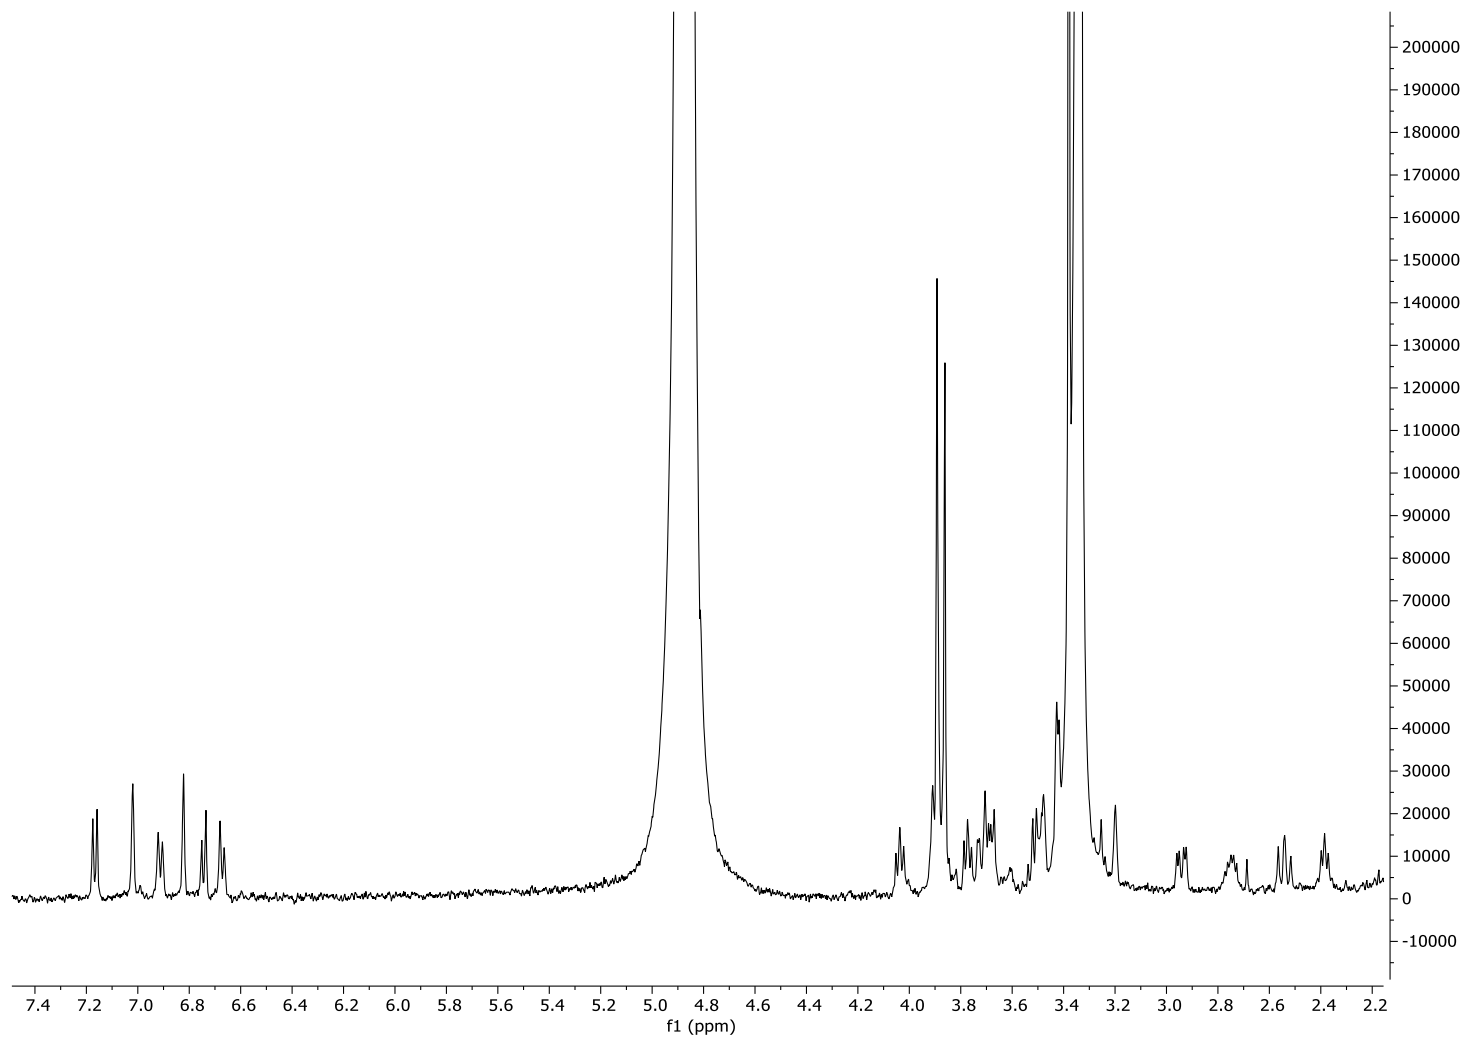

S2. HSQC (600 MHz, CD<sub>3</sub>OD) of *lariciresinol-4-O-β-D-glucopyranoside* (**1**)

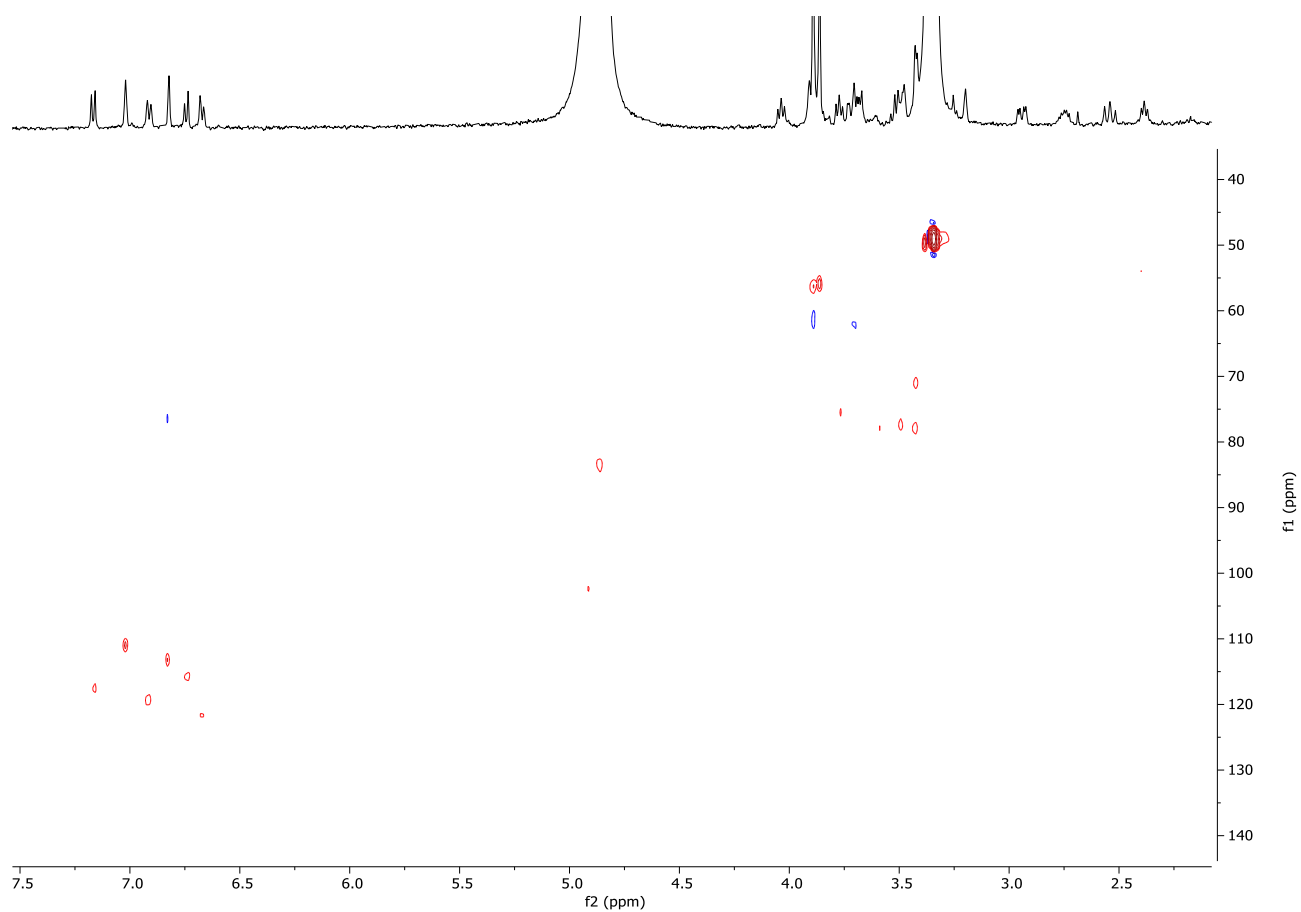

S3.  $^1\text{H}$  NMR (600 MHz,  $\text{CD}_3\text{OD}$ ) of (+)-lariciresinol-9- $O$ - $\beta$ -D-glucopyranoside (**2**).

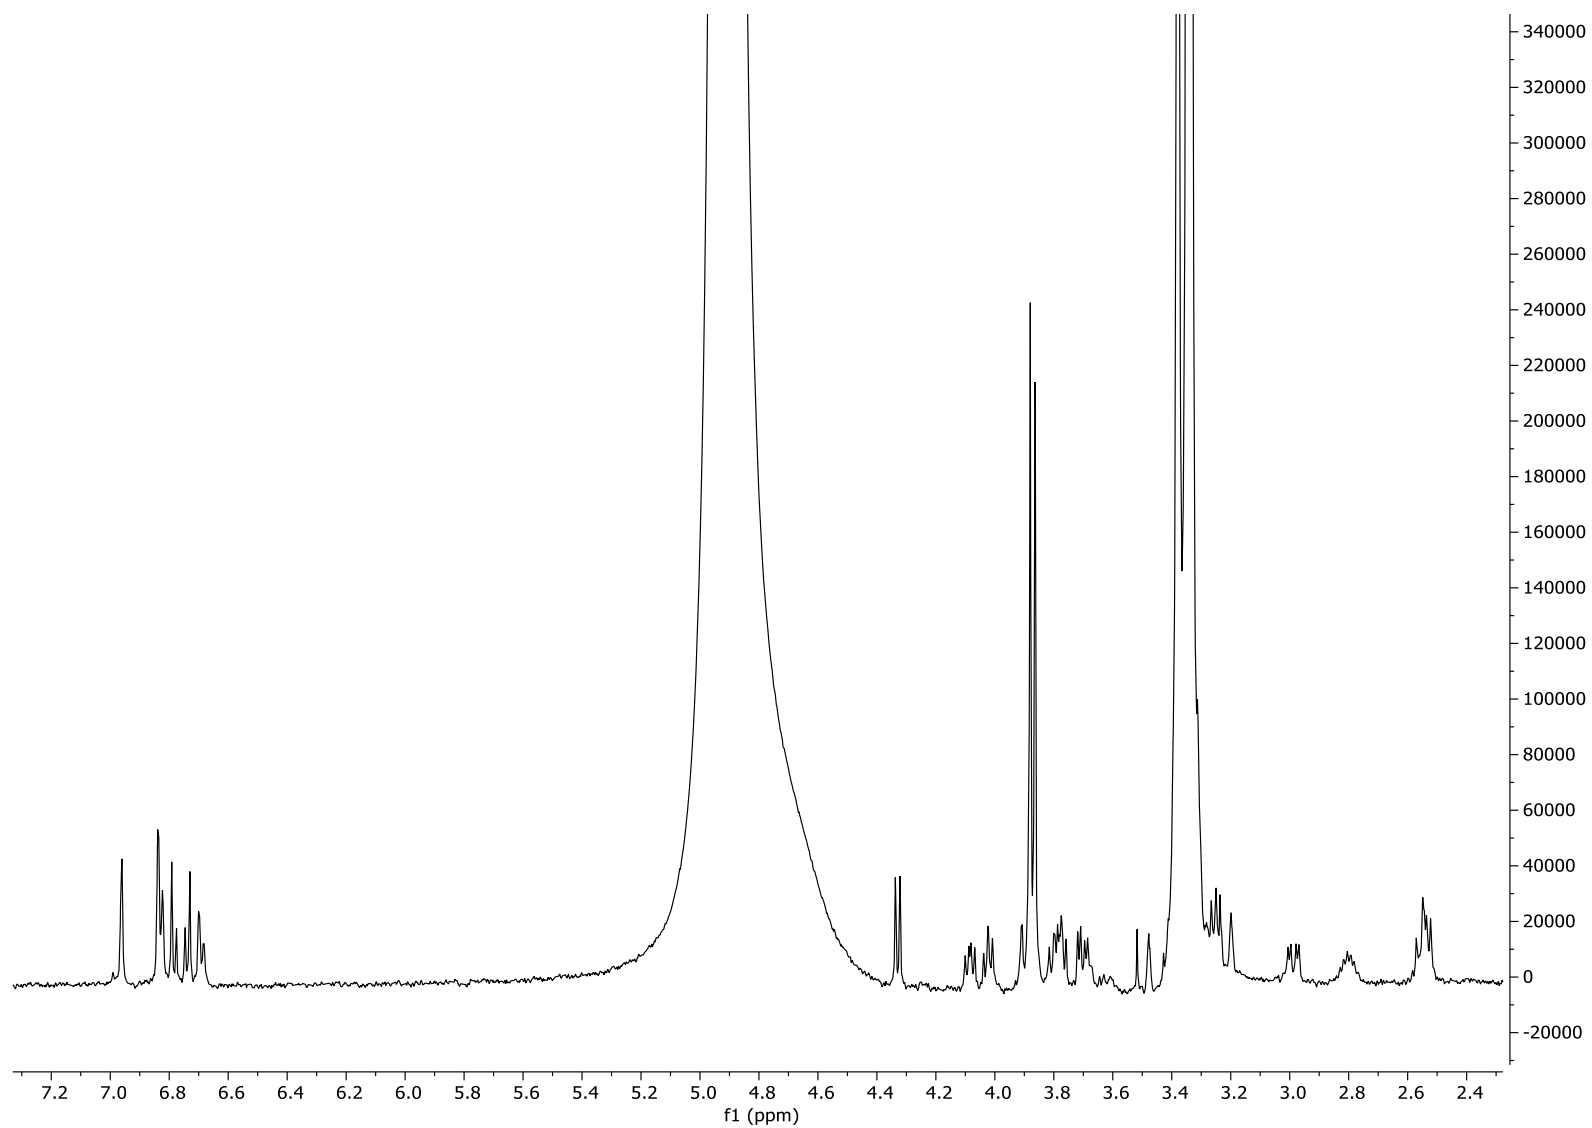

S4. HSQC (600 MHz, CD<sub>3</sub>OD) of (+)-lariciresinol-9-O- $\beta$ -D-glucopyranoside (**2**).

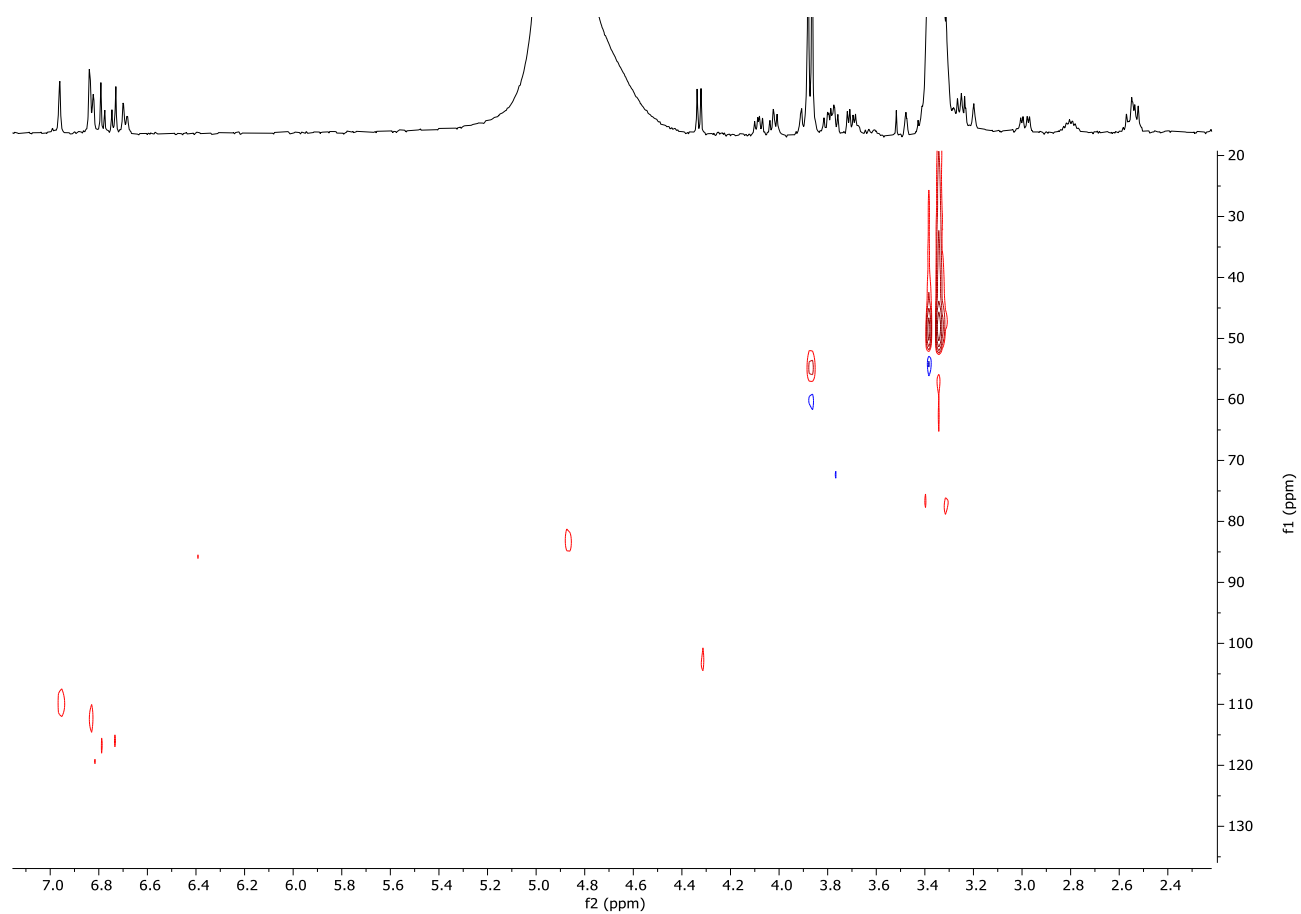

S5.  $^1\text{H}$  NMR (600 MHz,  $\text{CD}_3\text{OD}$ ) of *byzantionoside B* 9-*O*- $\alpha$ -*L*-rhamnopyranosyl-(1'' $\rightarrow$ 2')- $\beta$ -*D*-glucopyranoside (**3**).

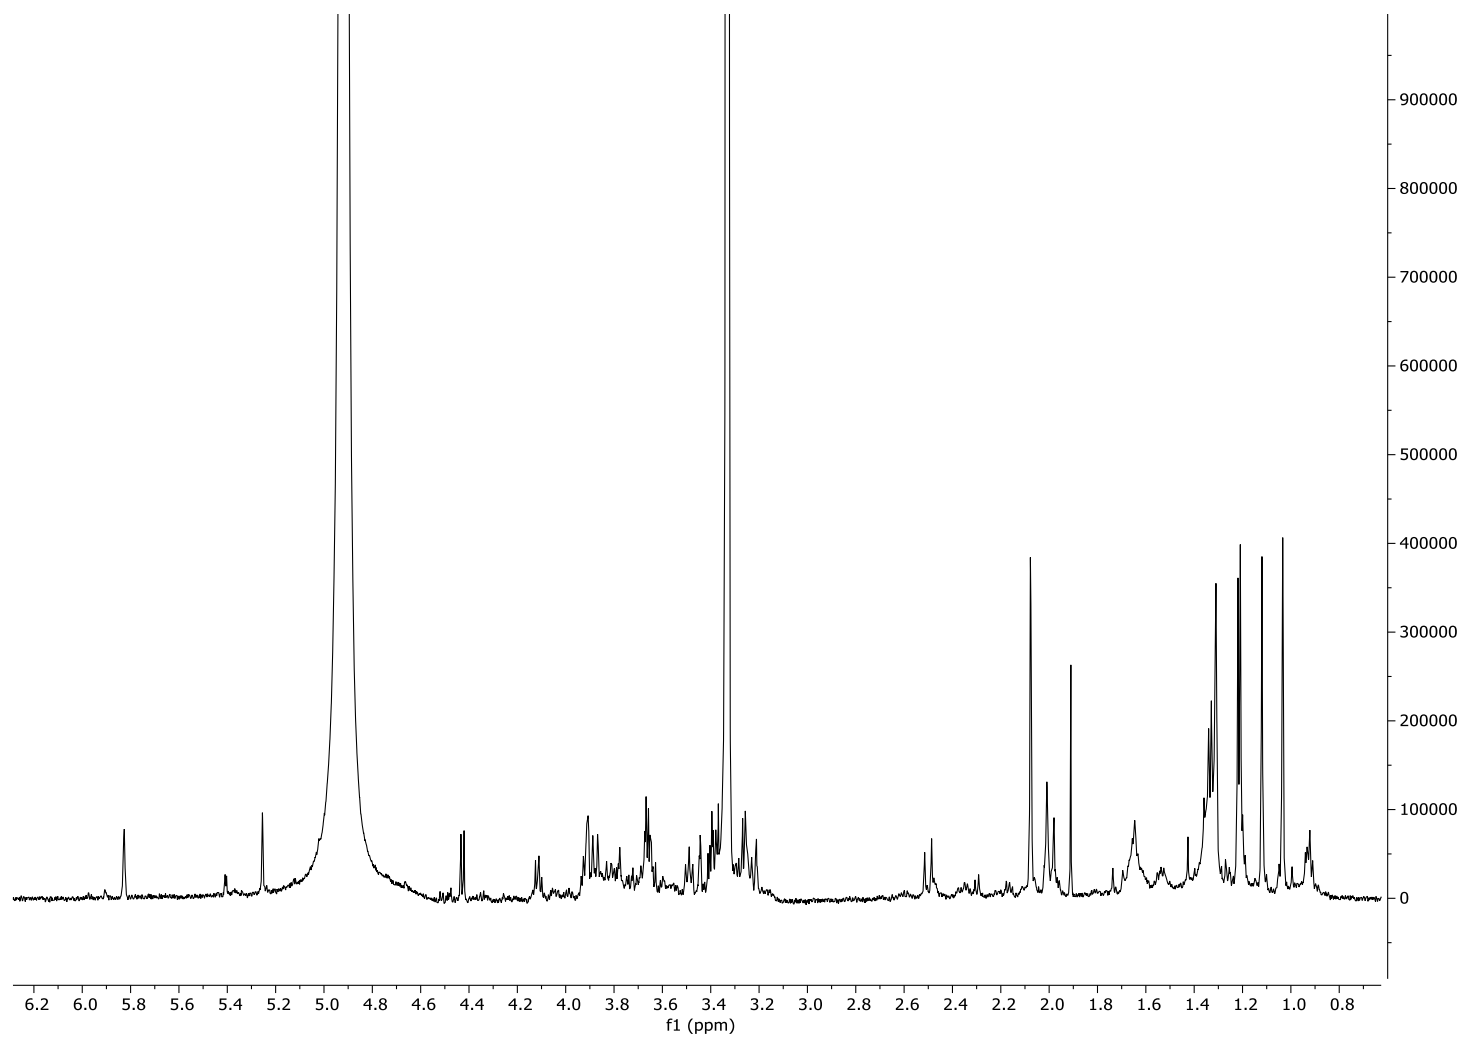

S6. HSQC (600 MHz, CD<sub>3</sub>OD) of *byzantionoside B* 9-*O*- $\alpha$ -L-rhamnopyranosyl-(1'' $\rightarrow$ 2')- $\beta$ -D-glucopyranoside (**3**).

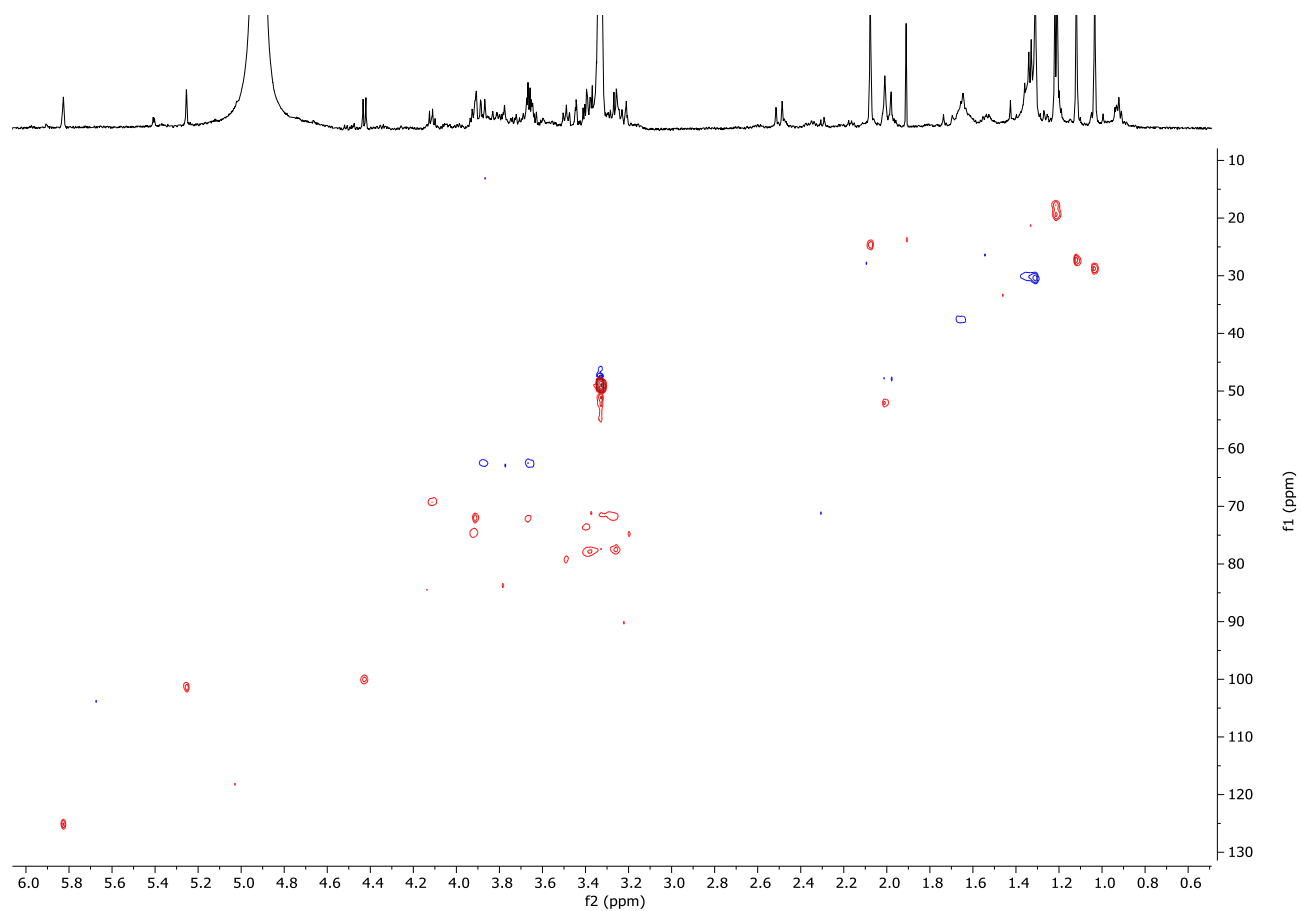

S7. HMBC (600 MHz, CD<sub>3</sub>OD) of *byzantionoside B* 9-*O*- $\alpha$ -L-rhamnopyranosyl-(1'' $\rightarrow$ 2')- $\beta$ -D-glucopyranoside (**3**)

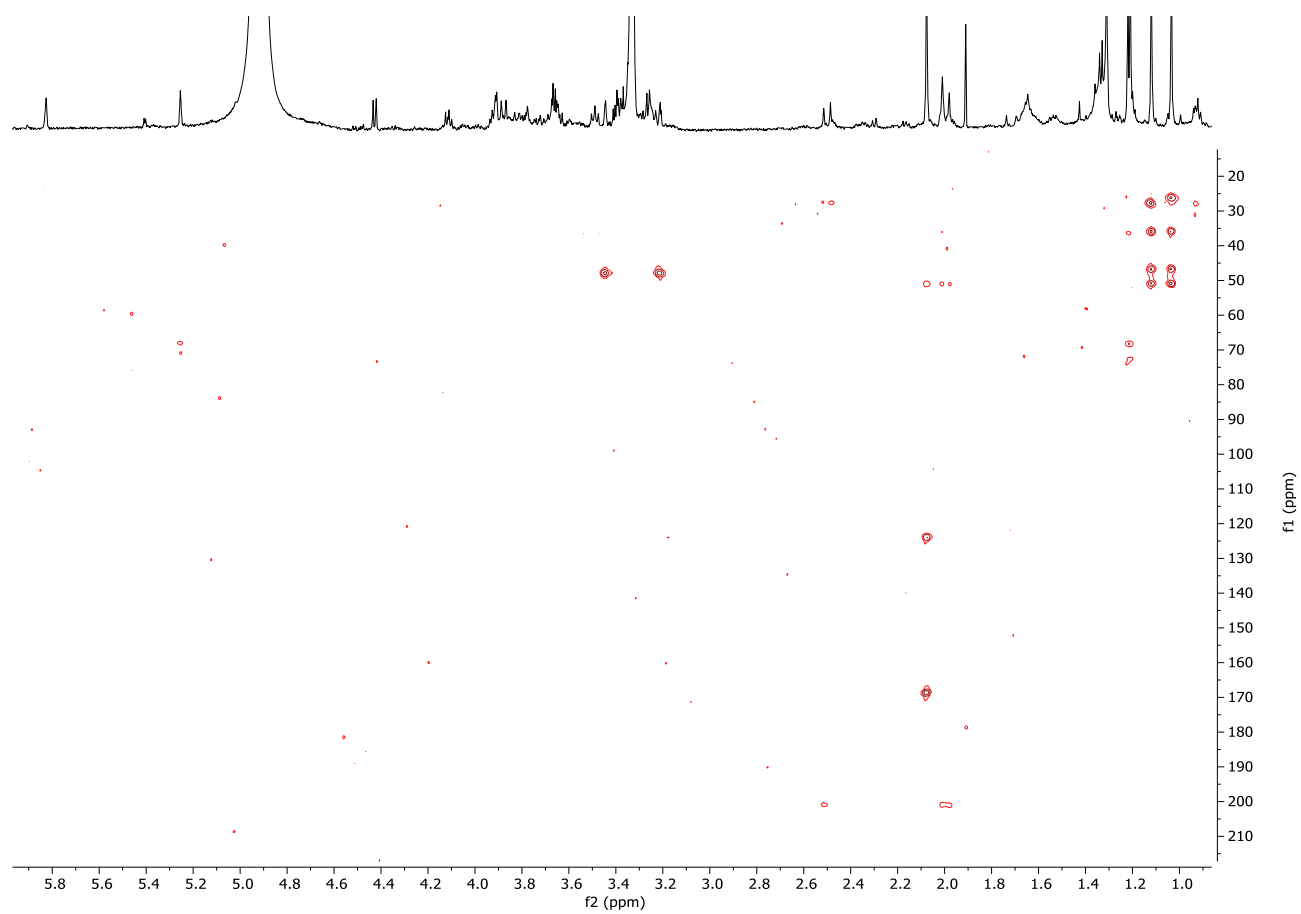



S8.  $^1\text{H}$  NMR (600 MHz,  $\text{CD}_3\text{OD}$ ) of *byzantionoside B* (**4**).

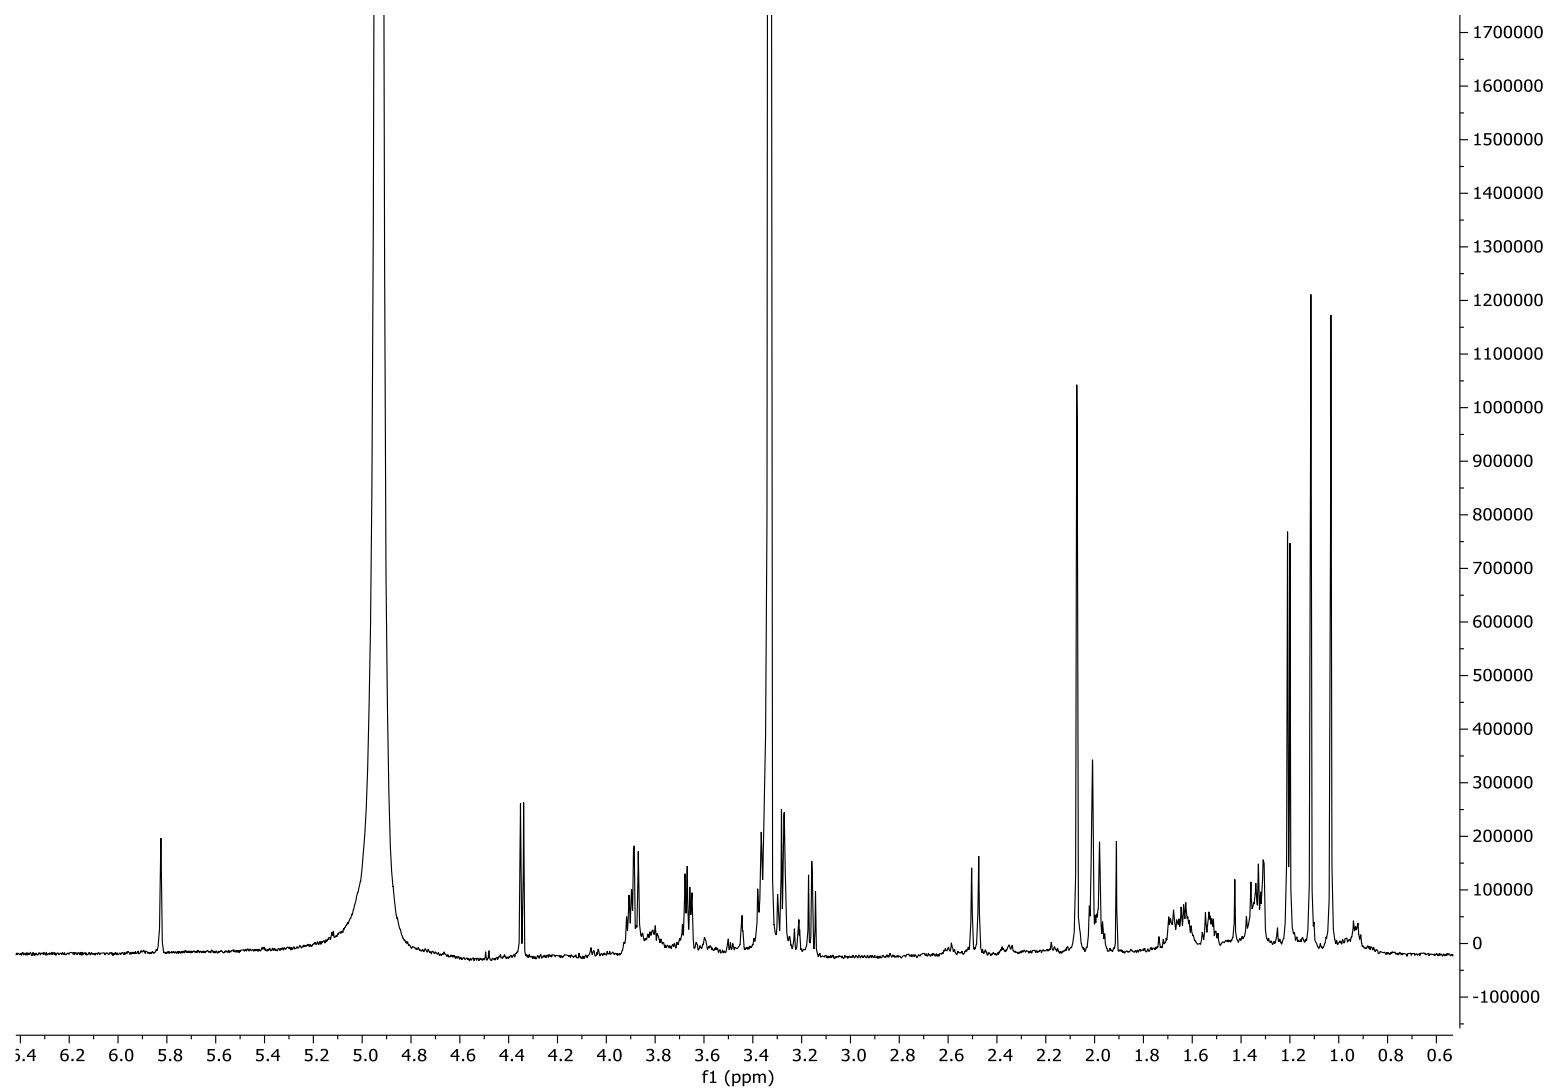

S9. HSQC (600 MHz, CD<sub>3</sub>OD) of *byzantionoside B* (**4**).

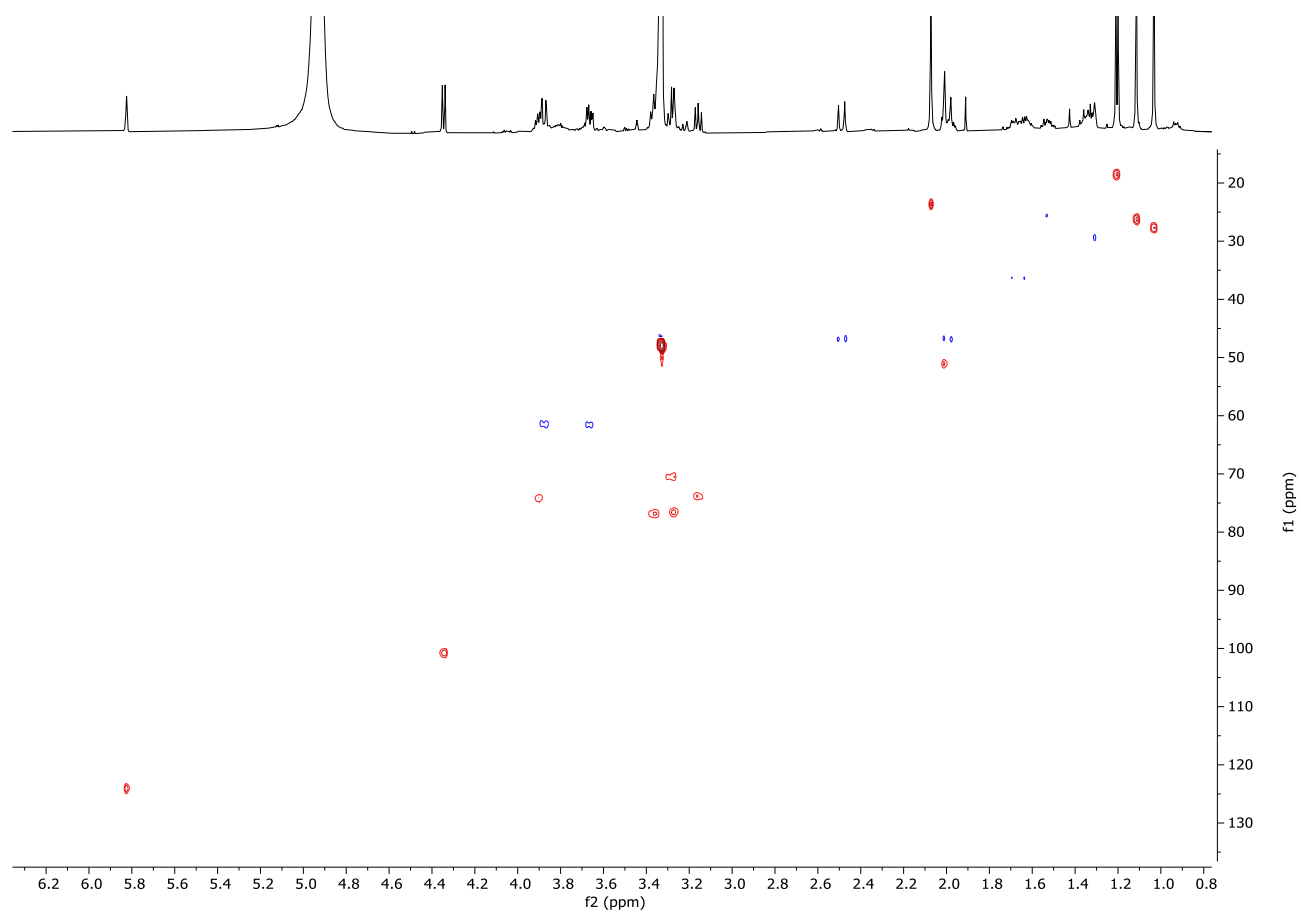

S10. HMBC (600 MHz, CD<sub>3</sub>OD) of *byzantionoside B* (**4**).

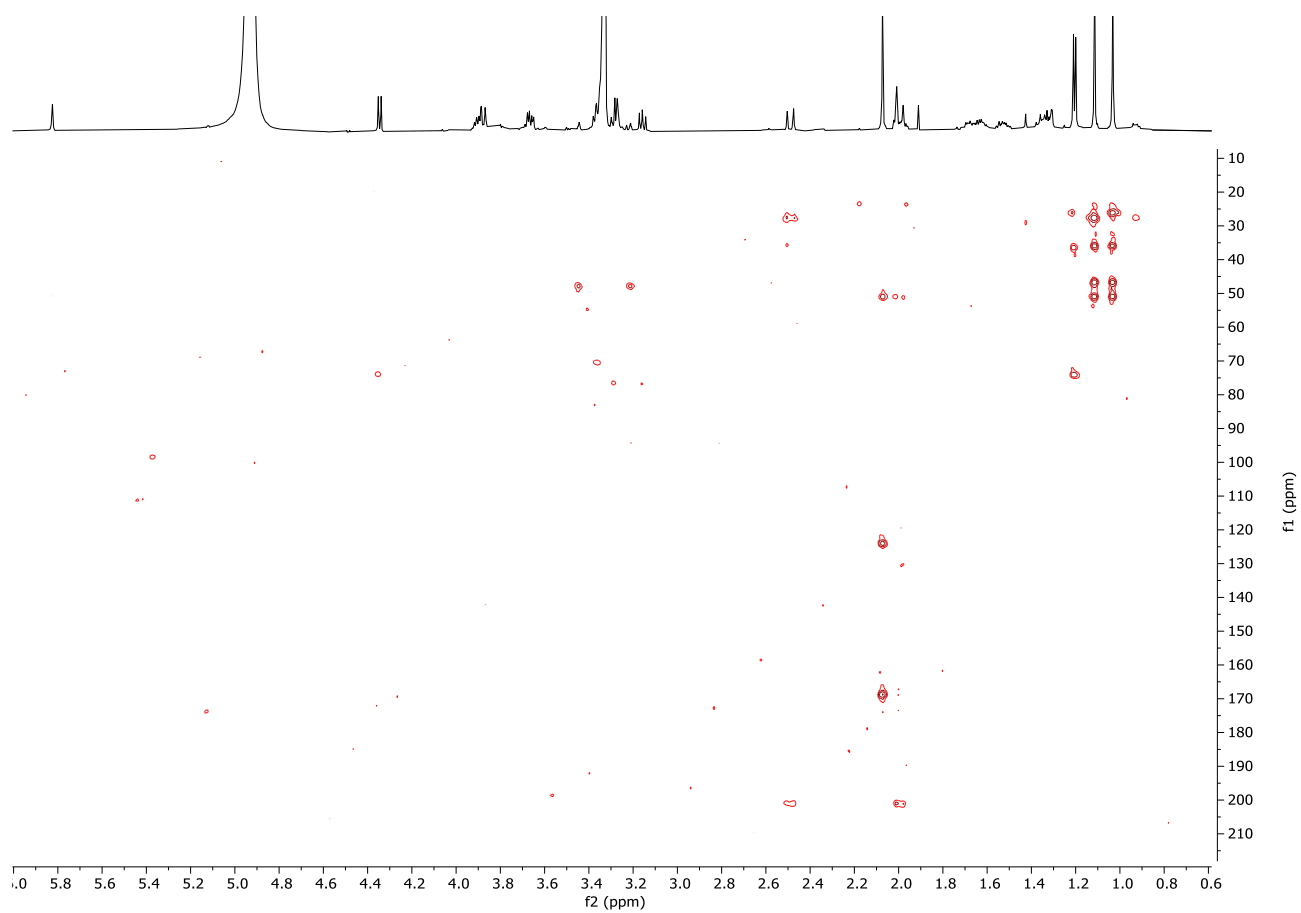

S11.  $^1\text{H}$  NMR (600 MHz,  $\text{CD}_3\text{OD}$ ) of dehydrodiconiferyl alcohol-4- $O$ - $\beta$ - $D$ -glucopyranoside (**5**).

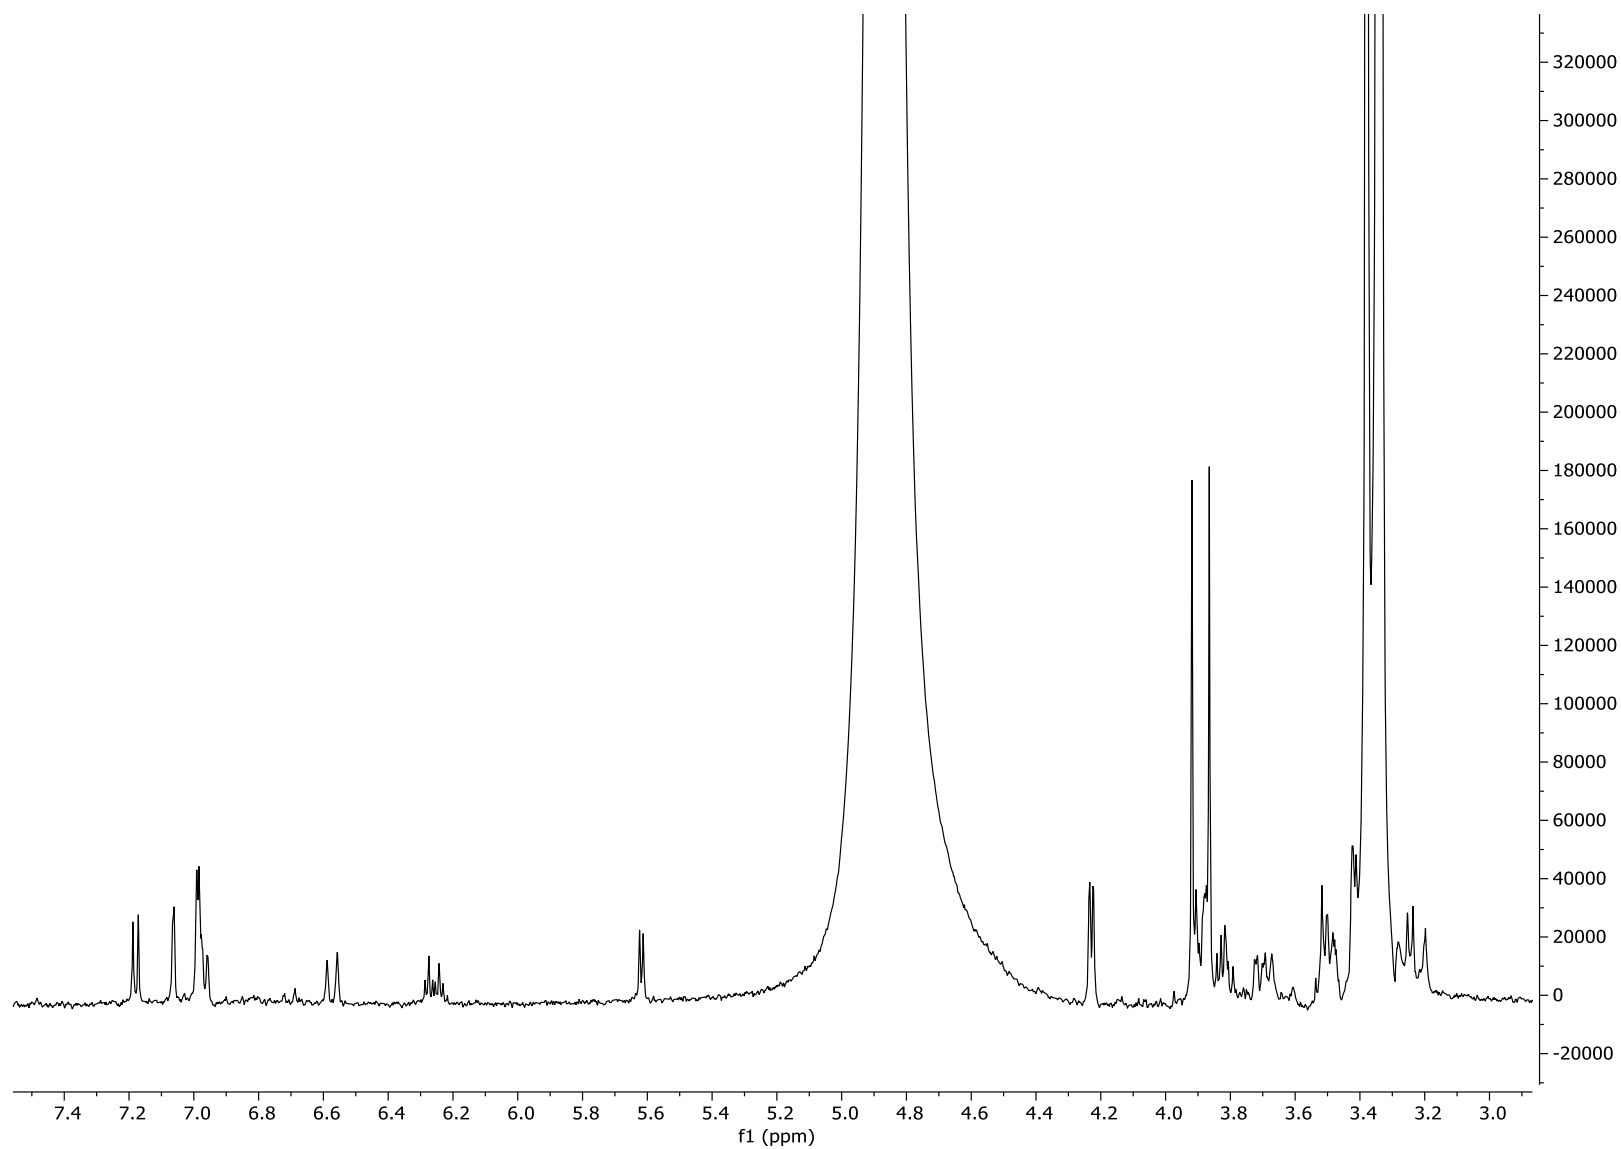

S12. HSQC (600 MHz, CD<sub>3</sub>OD) of dehydrodiconiferyl alcohol-4-*O*- $\beta$ -D-glucopyranoside (**5**).

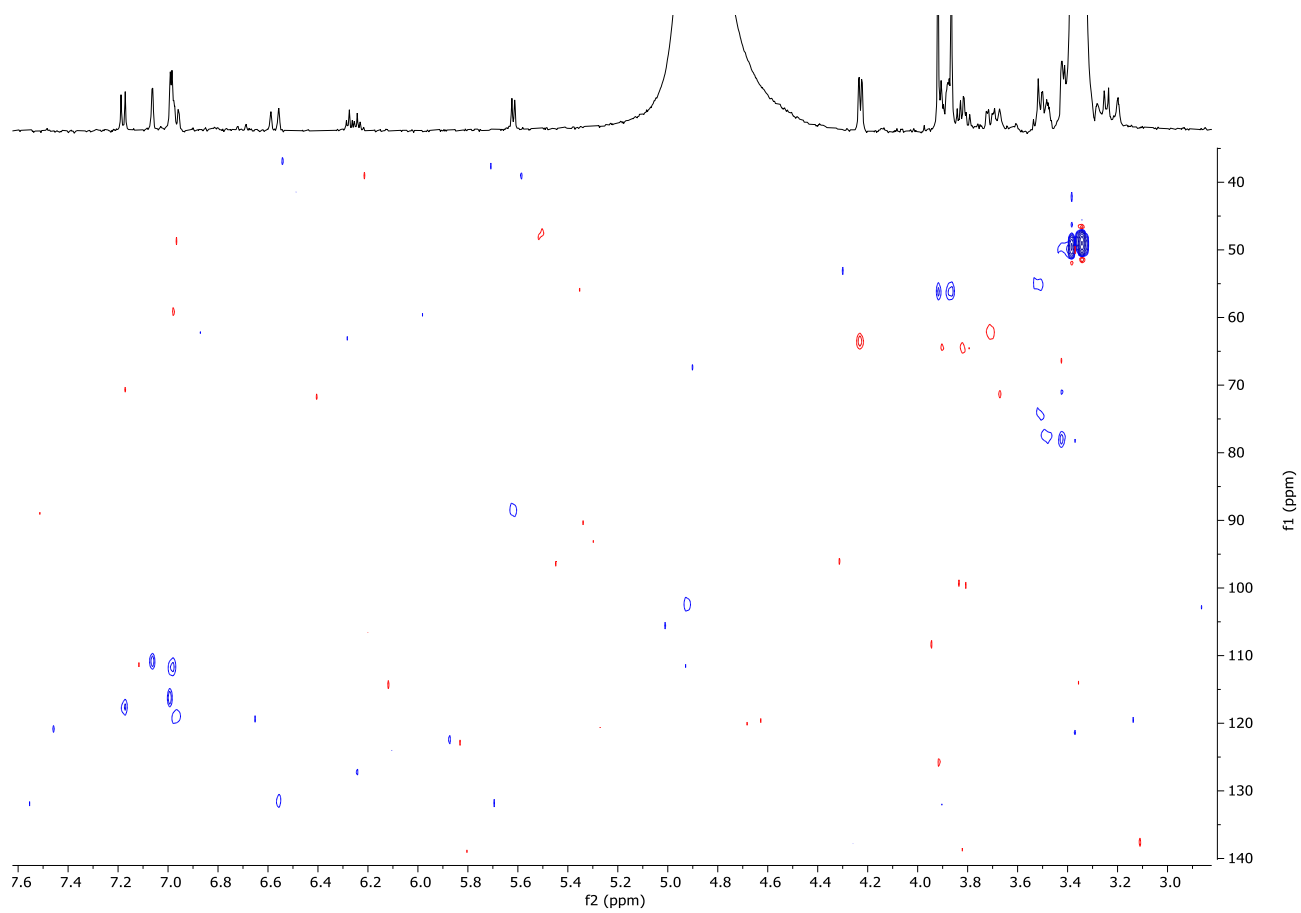

S13. HMBC (600 MHz, CD<sub>3</sub>OD) of dehydrodiconiferyl alcohol-4-O- $\beta$ -D-glucopyranoside (**5**).

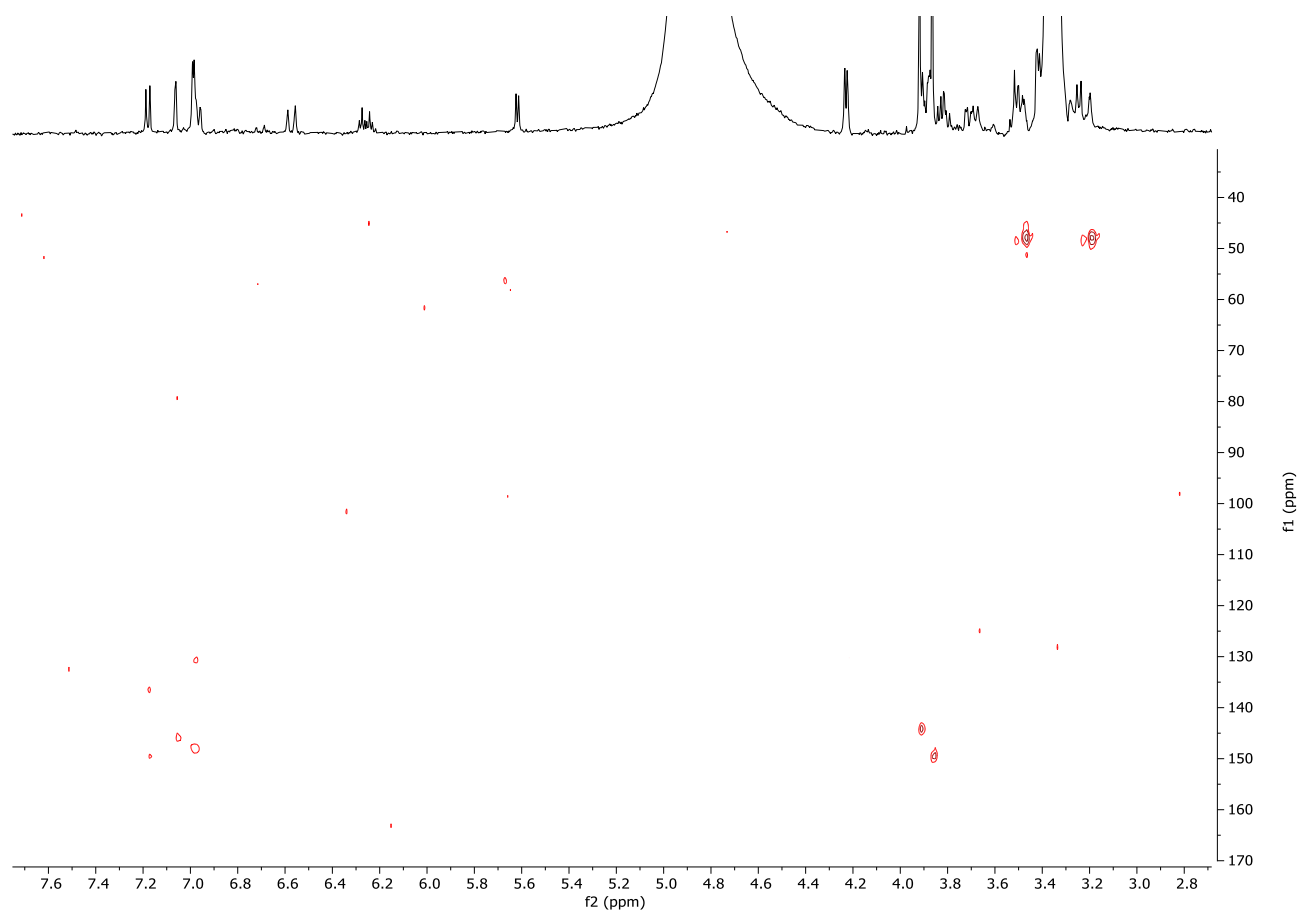

S14.  $^1\text{H}$  NMR (600 MHz,  $\text{CD}_3\text{OD}$ ) of (+)-*isolariciresinol* (**6**).

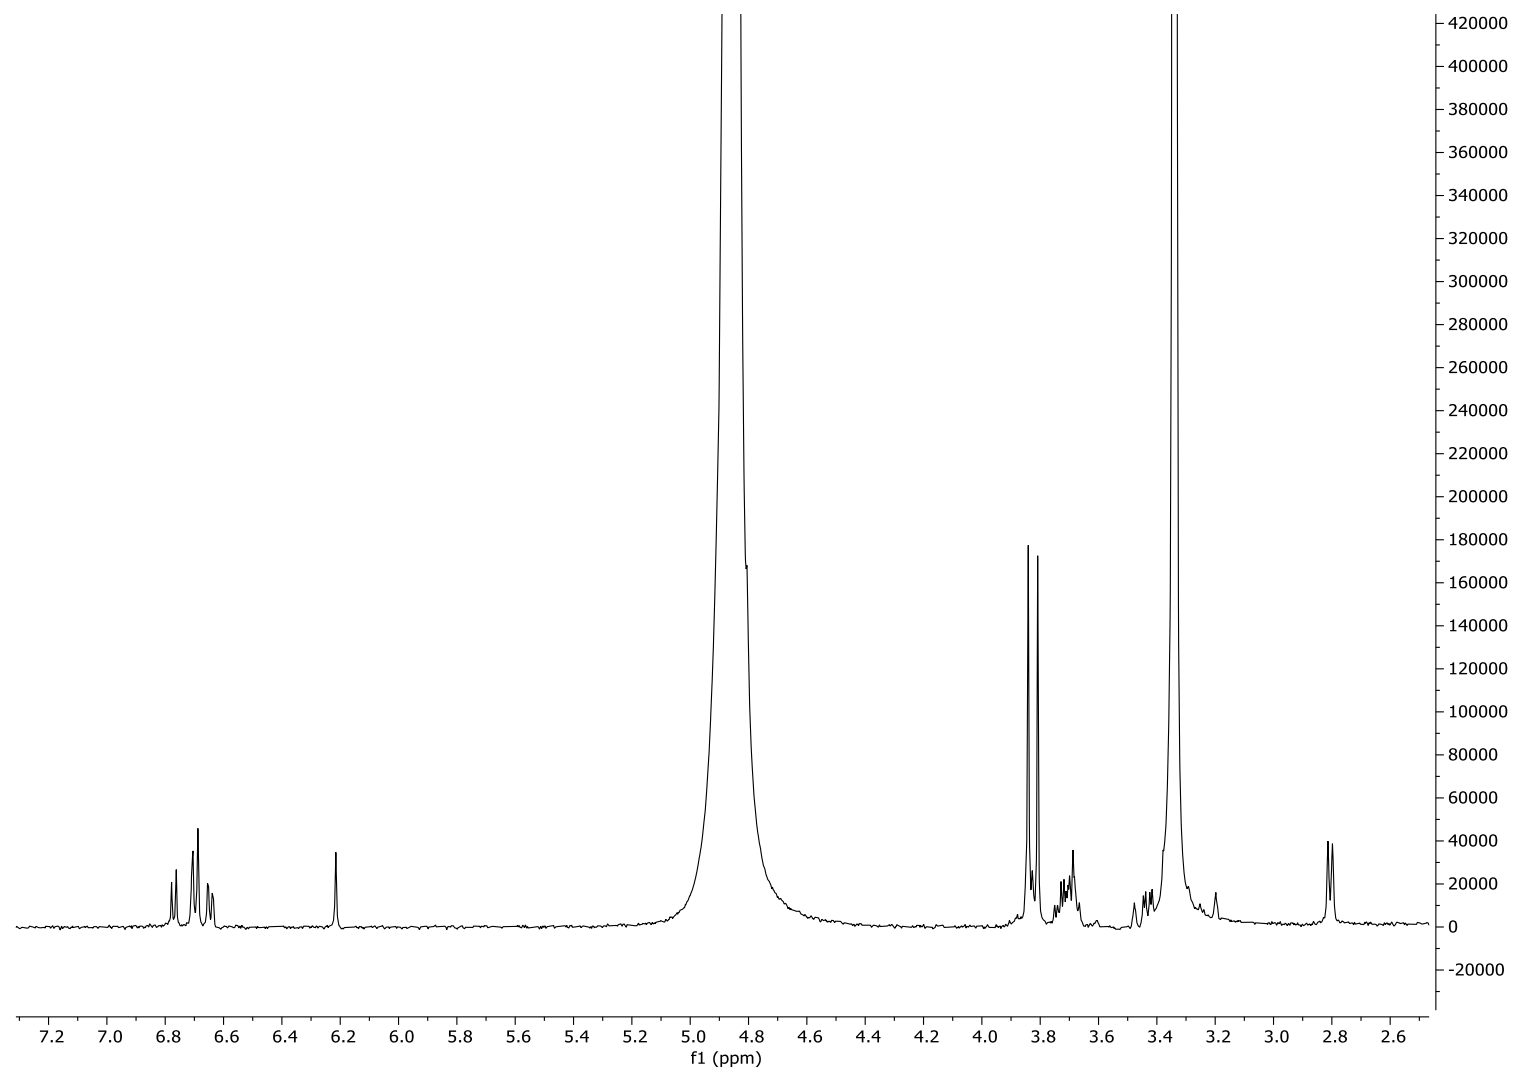

S15. HSQC (600 MHz, CD<sub>3</sub>OD) of (+)-isolariciresinol (**6**).

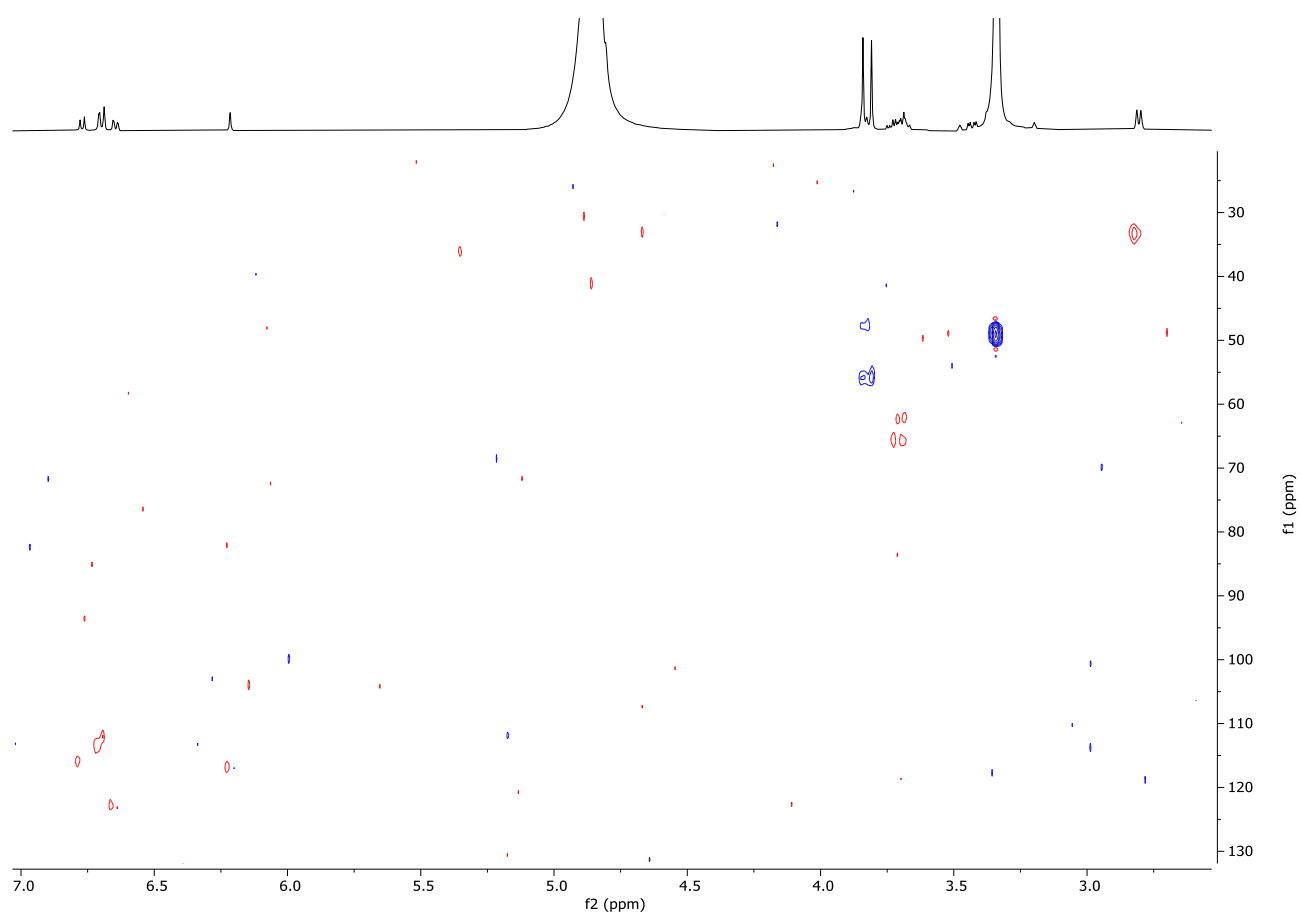



S16. HMBC (600 MHz, CD<sub>3</sub>OD) of (+)-isolariciresinol (**6**).

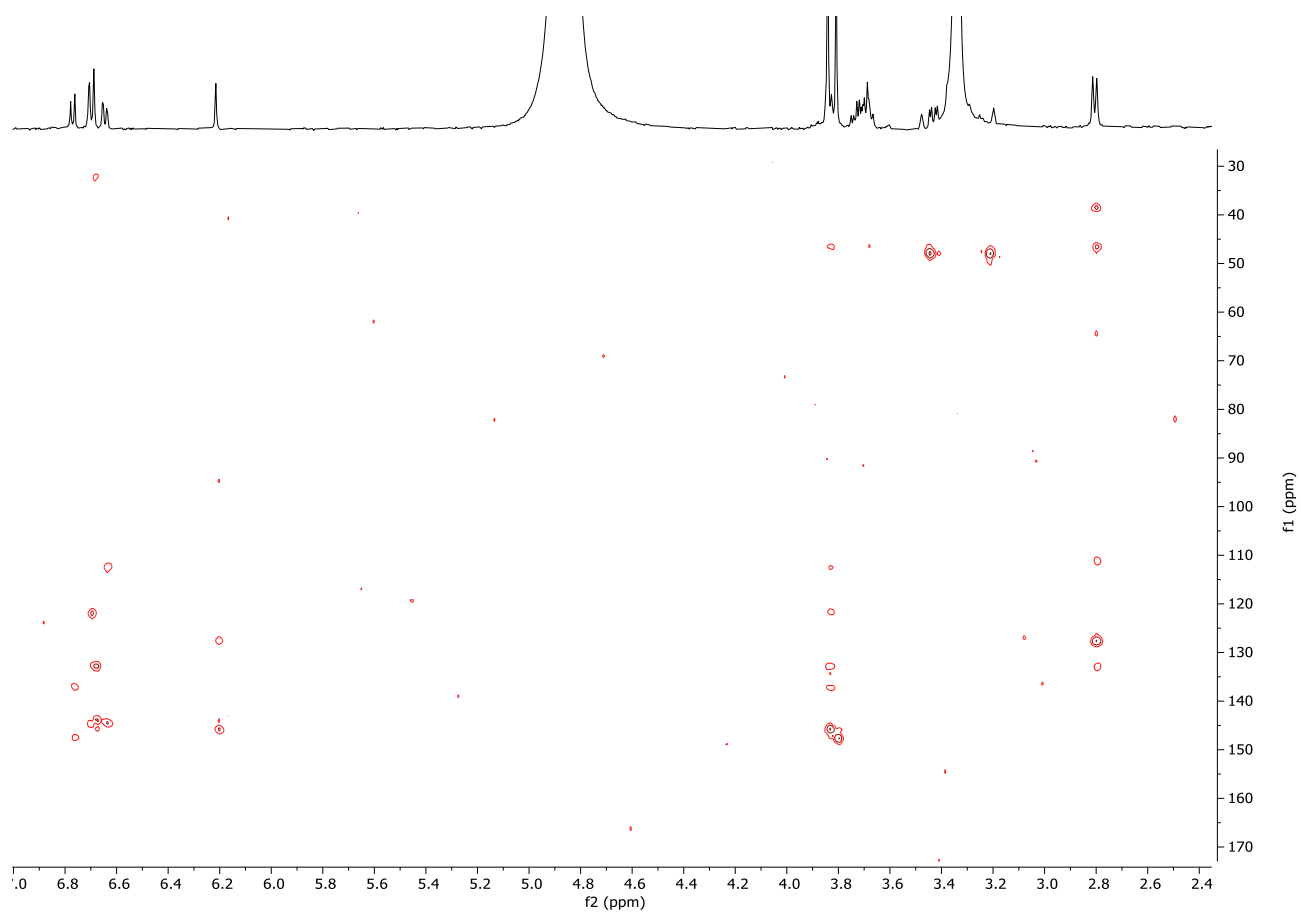

S17.  $^1\text{H}$ - $^1\text{H}$  COSY (600 MHz,  $\text{CD}_3\text{OD}$ ) of (+)-isolariciresinol (**6**).

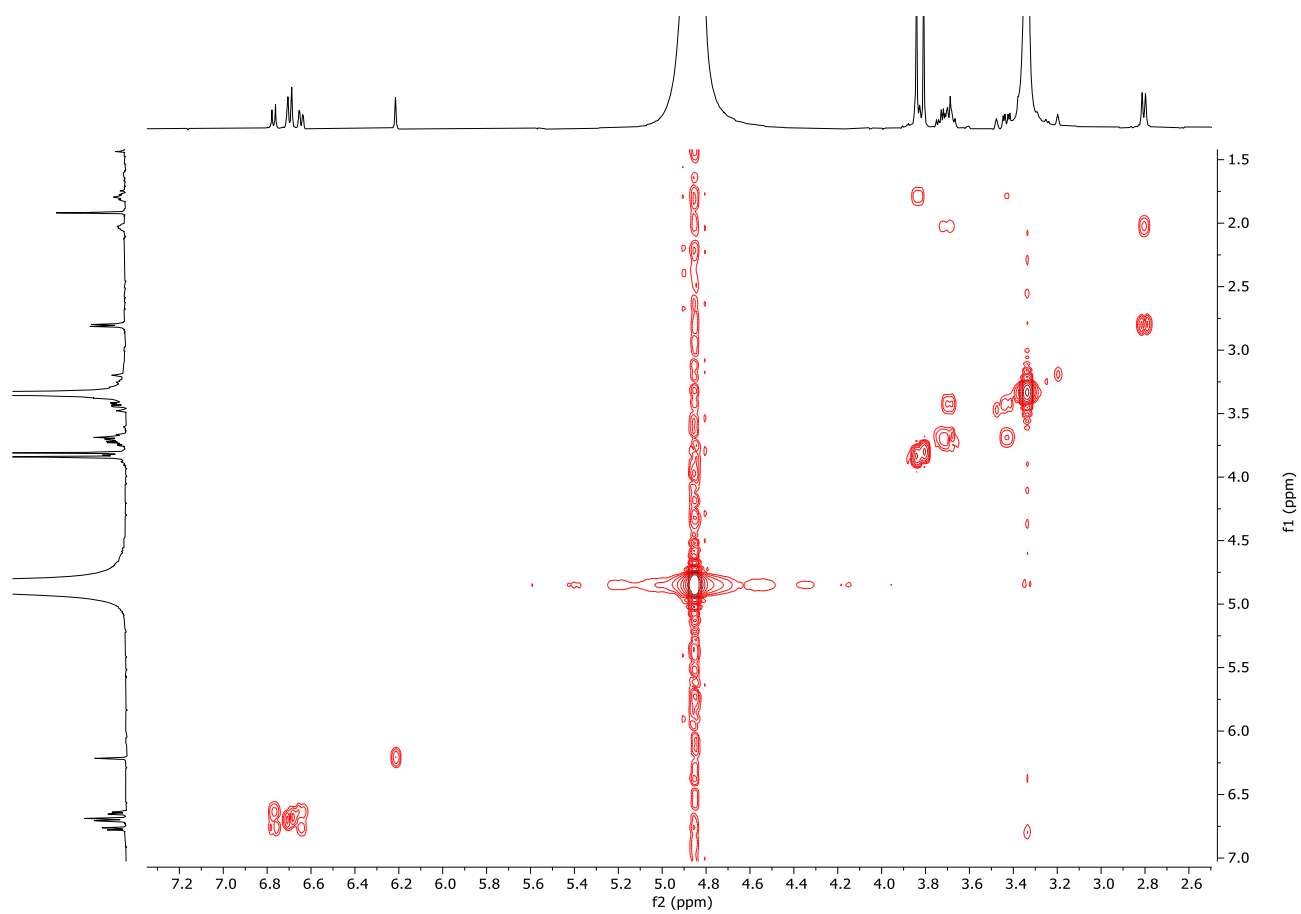

S18.  $^1\text{H}$  NMR (600 MHz,  $\text{CD}_3\text{OD}$ ) of *dehydrodiconiferyl alcohol-9-O- $\beta$ -D-glucopyranoside (7)*.

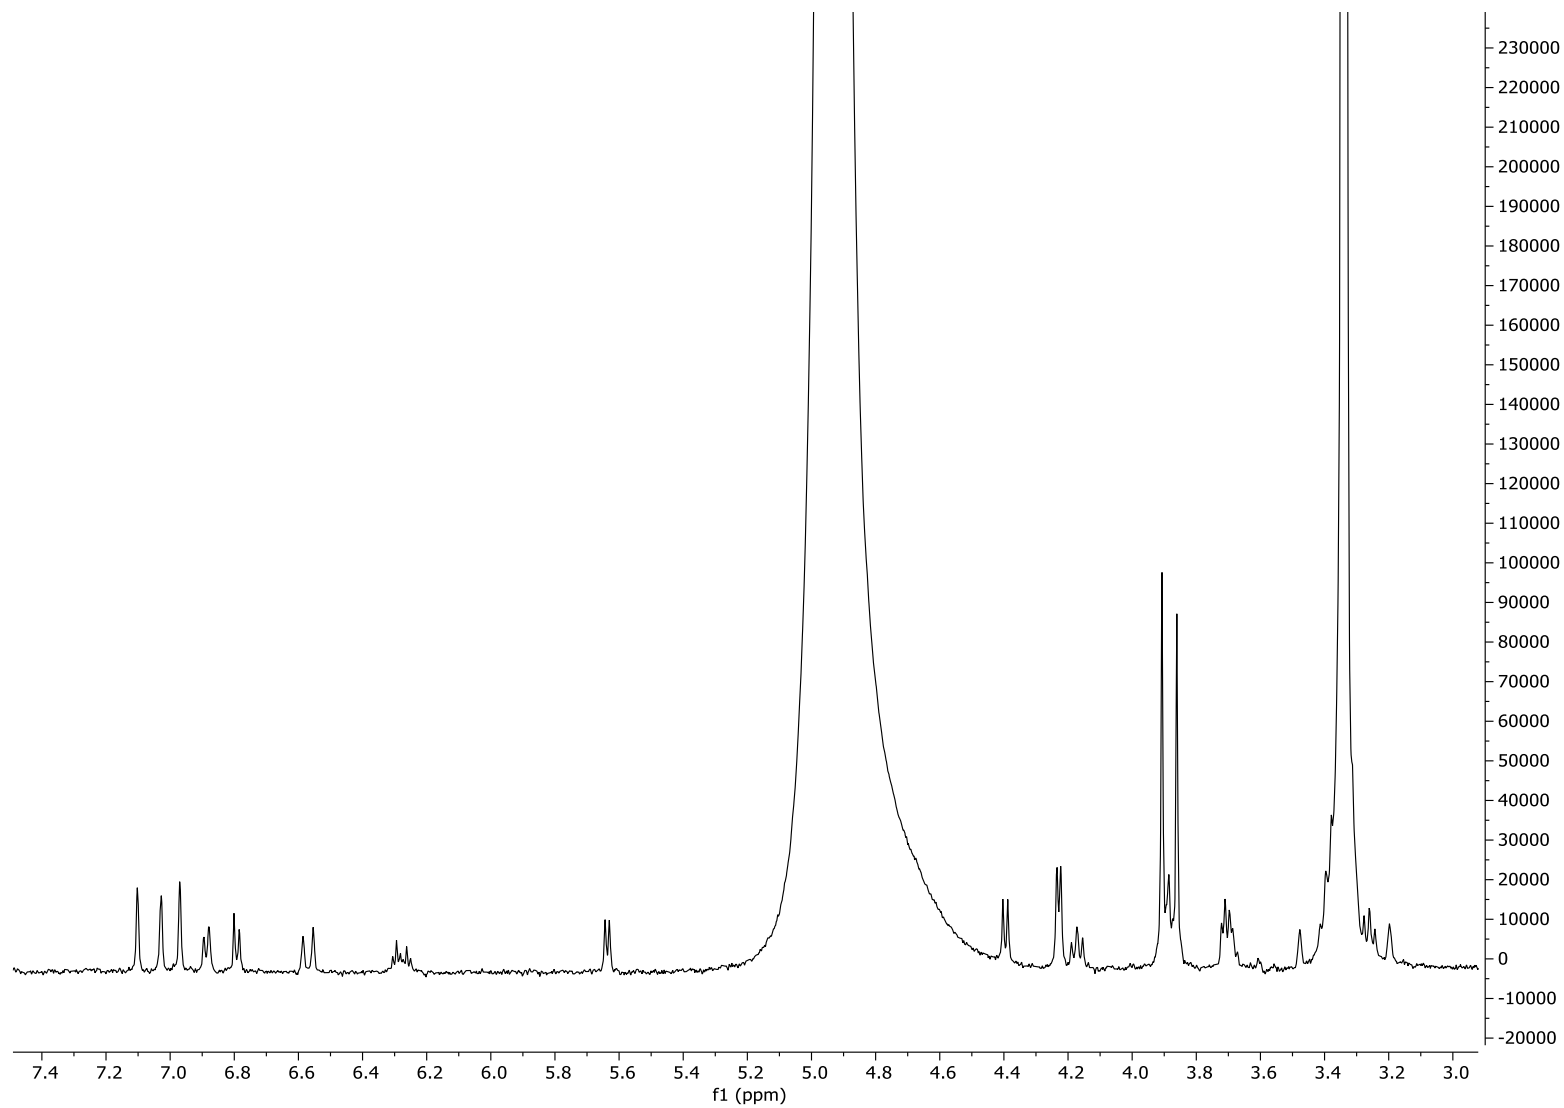

S19. HSQC (600 MHz, CD<sub>3</sub>OD) of *dehydrodiconiferyl alcohol-9-O-β-D-glucopyranoside (7)*.

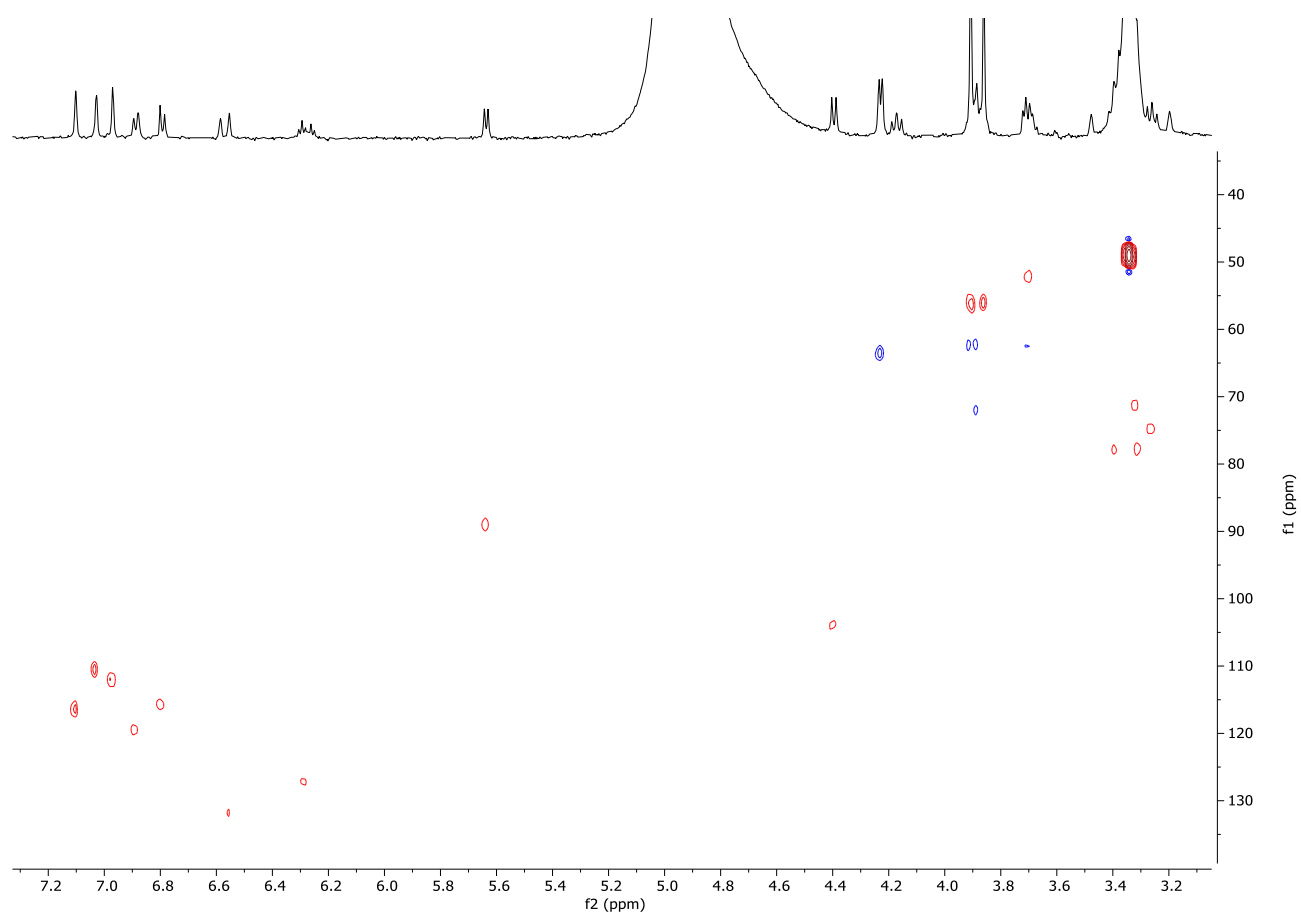

S20. HMBC (600 MHz, CD<sub>3</sub>OD) of *dehydrodiconiferyl alcohol-9-O-β-D-glucopyranoside (7)*.

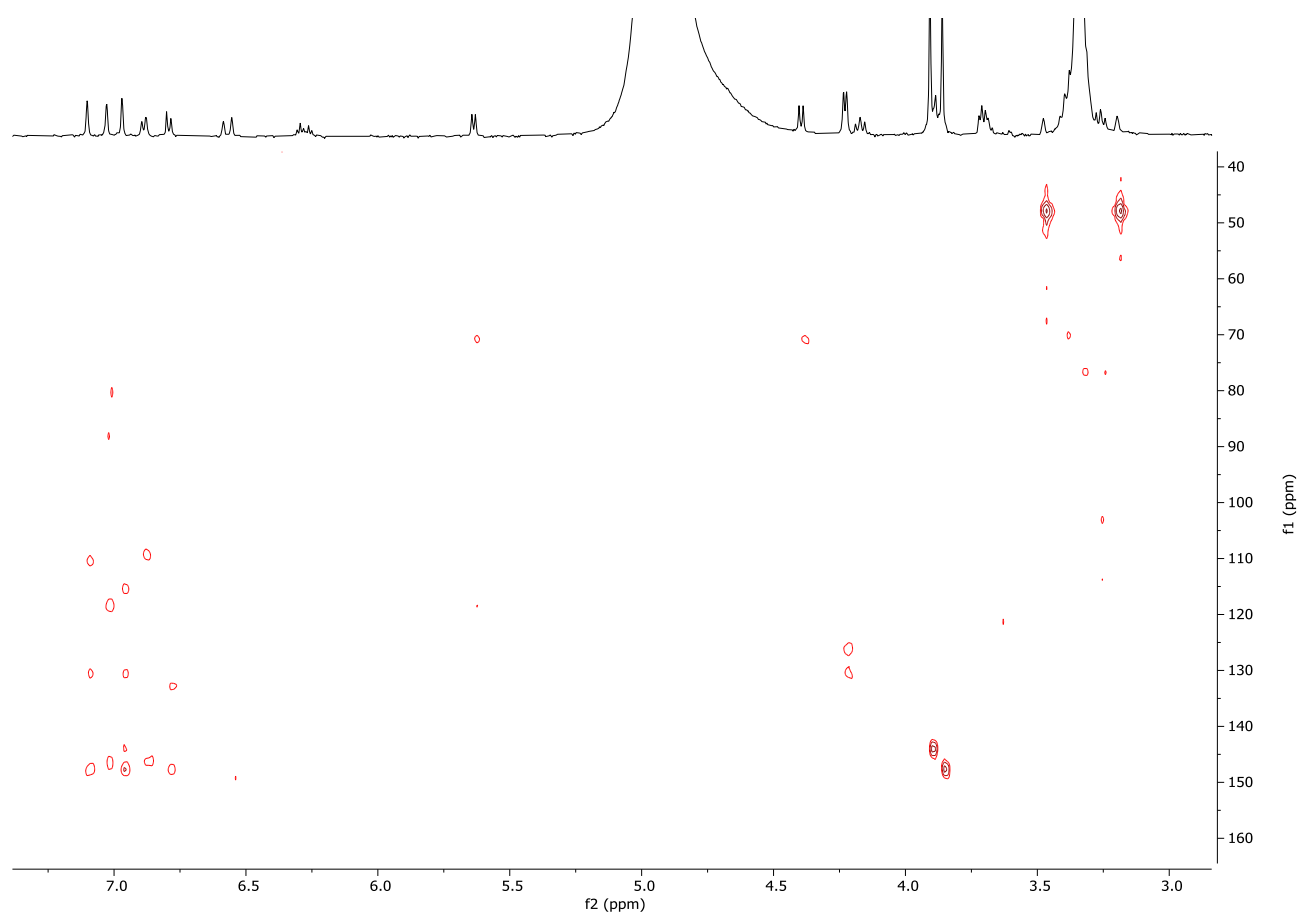

S21.  $^1\text{H}$ - $^1\text{H}$  COSY NMR (600 MHz,  $\text{CD}_3\text{OD}$ ) of *dehydrodiconiferyl alcohol-9-O- $\beta$ -D-glucopyranoside* (7).

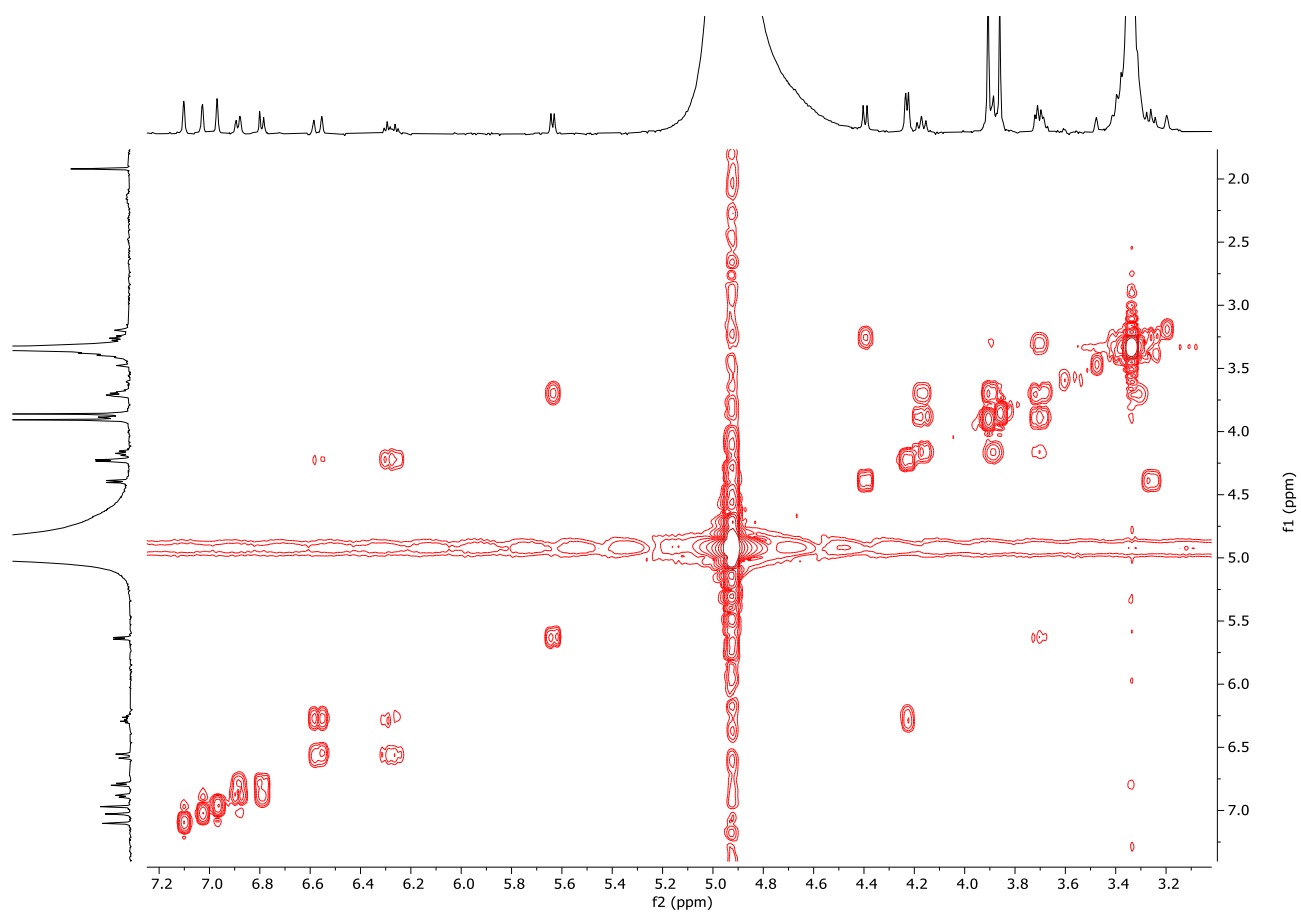

S22.  $^1\text{H}$  NMR (600 MHz,  $\text{CD}_3\text{OD}$ ) of 3,4,5-tri-*O*-methyl gallic acid (**8**).

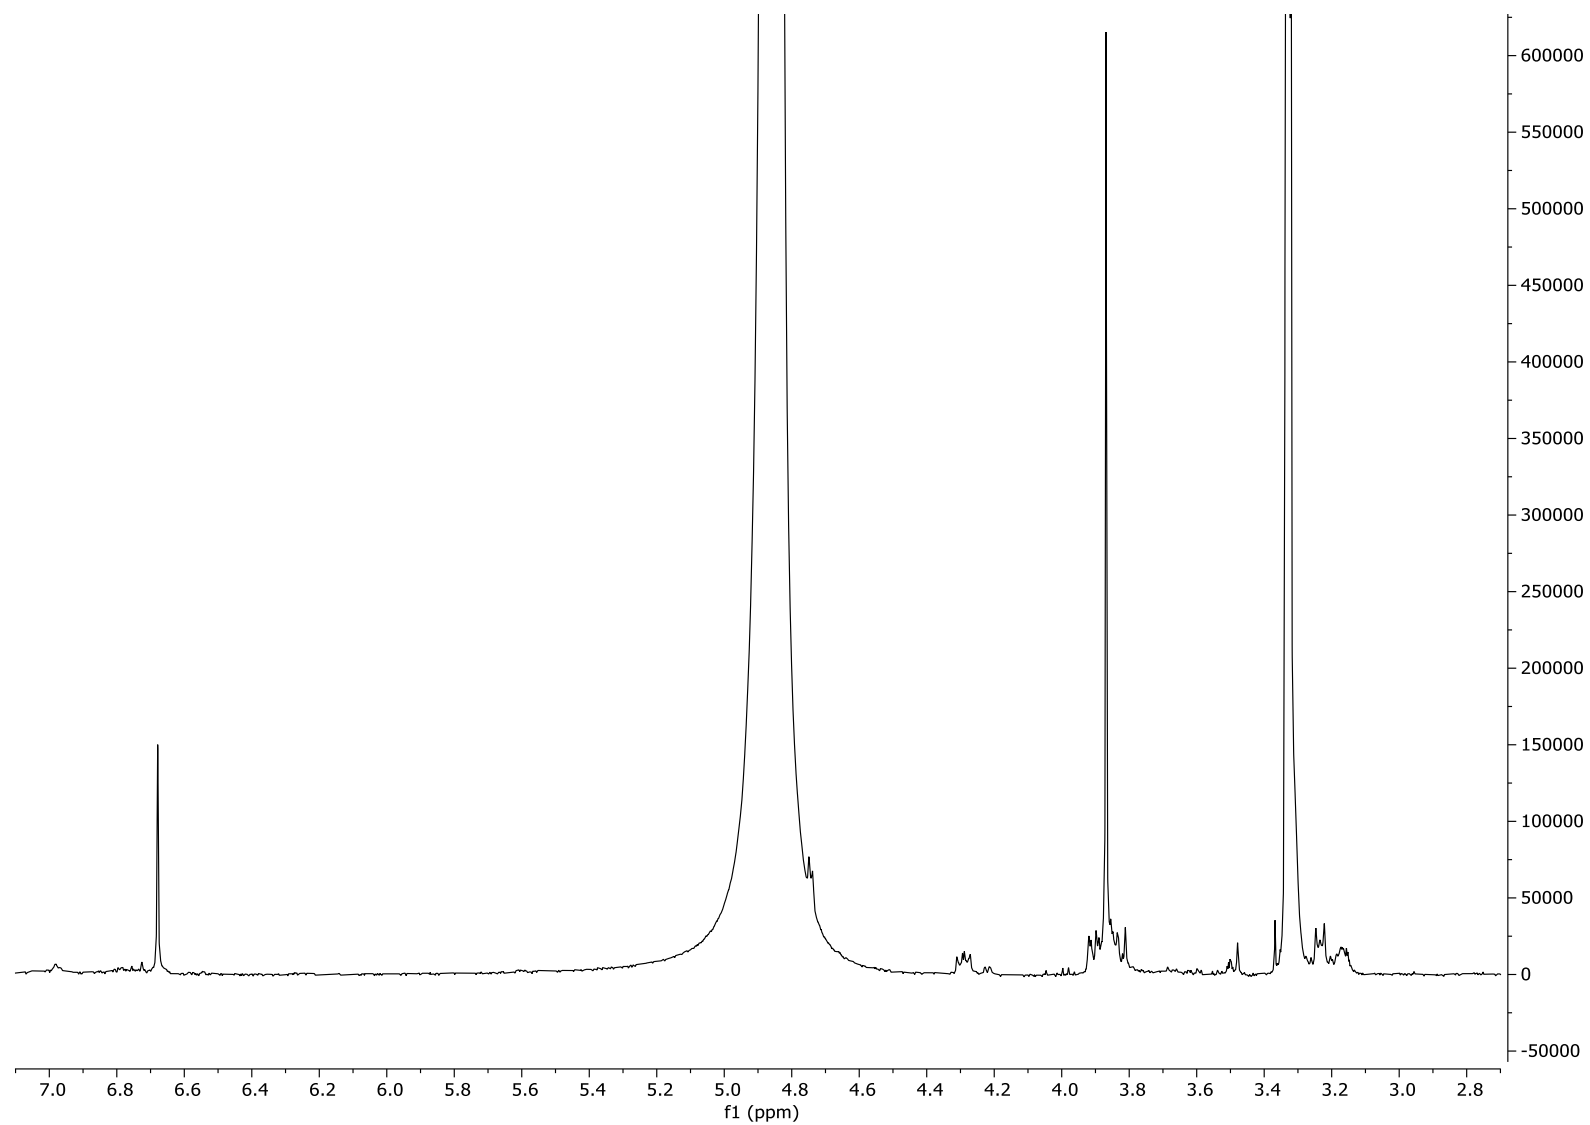

S23. HSQC (600 MHz, CD<sub>3</sub>OD) of 3,4,5-tri-*O*-methyl gallic acid (**8**).

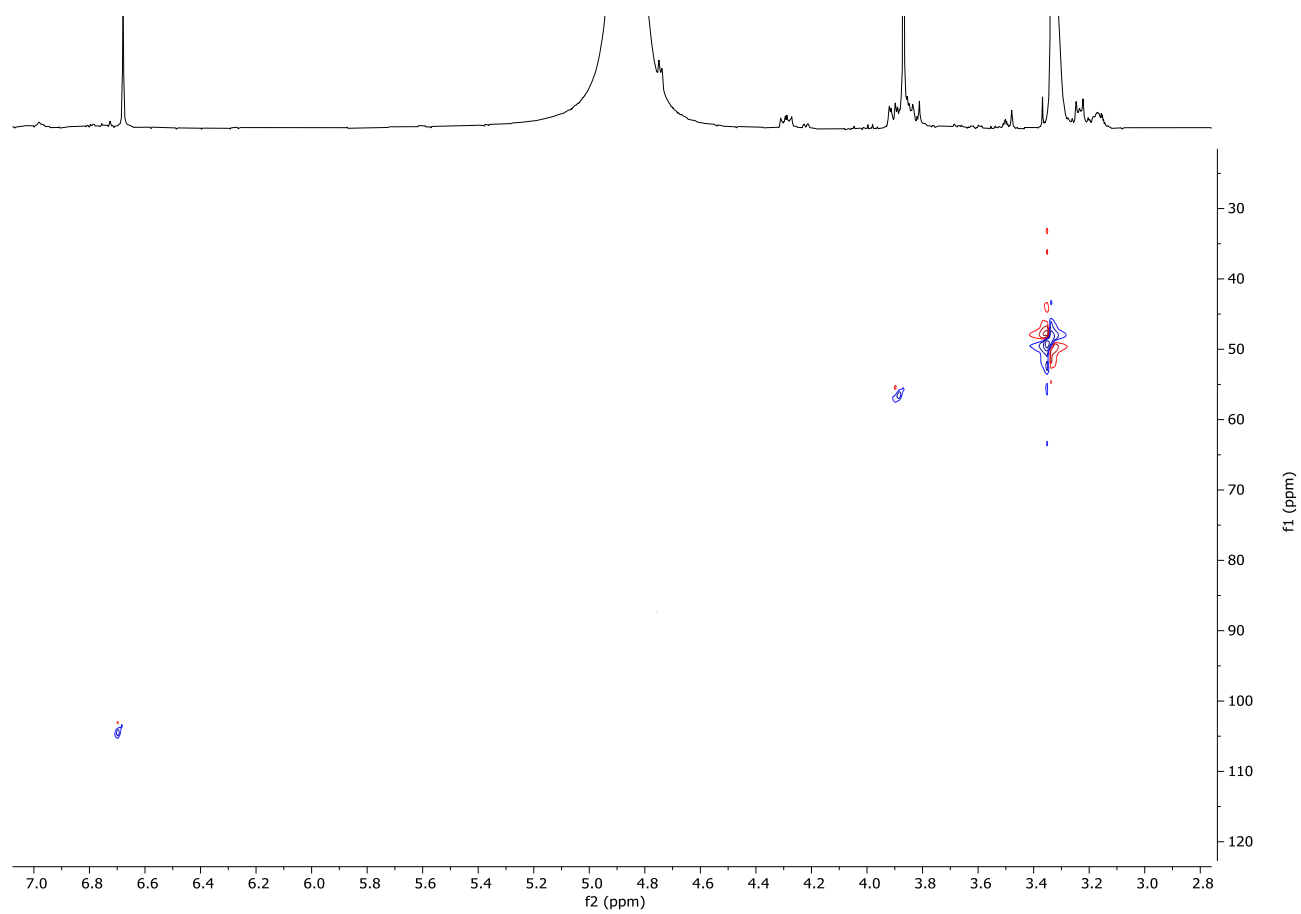



S24.  $^1\text{H}$  NMR (600 MHz,  $\text{CD}_3\text{OD}$ ) of (+)-lariciresinol (**9**).

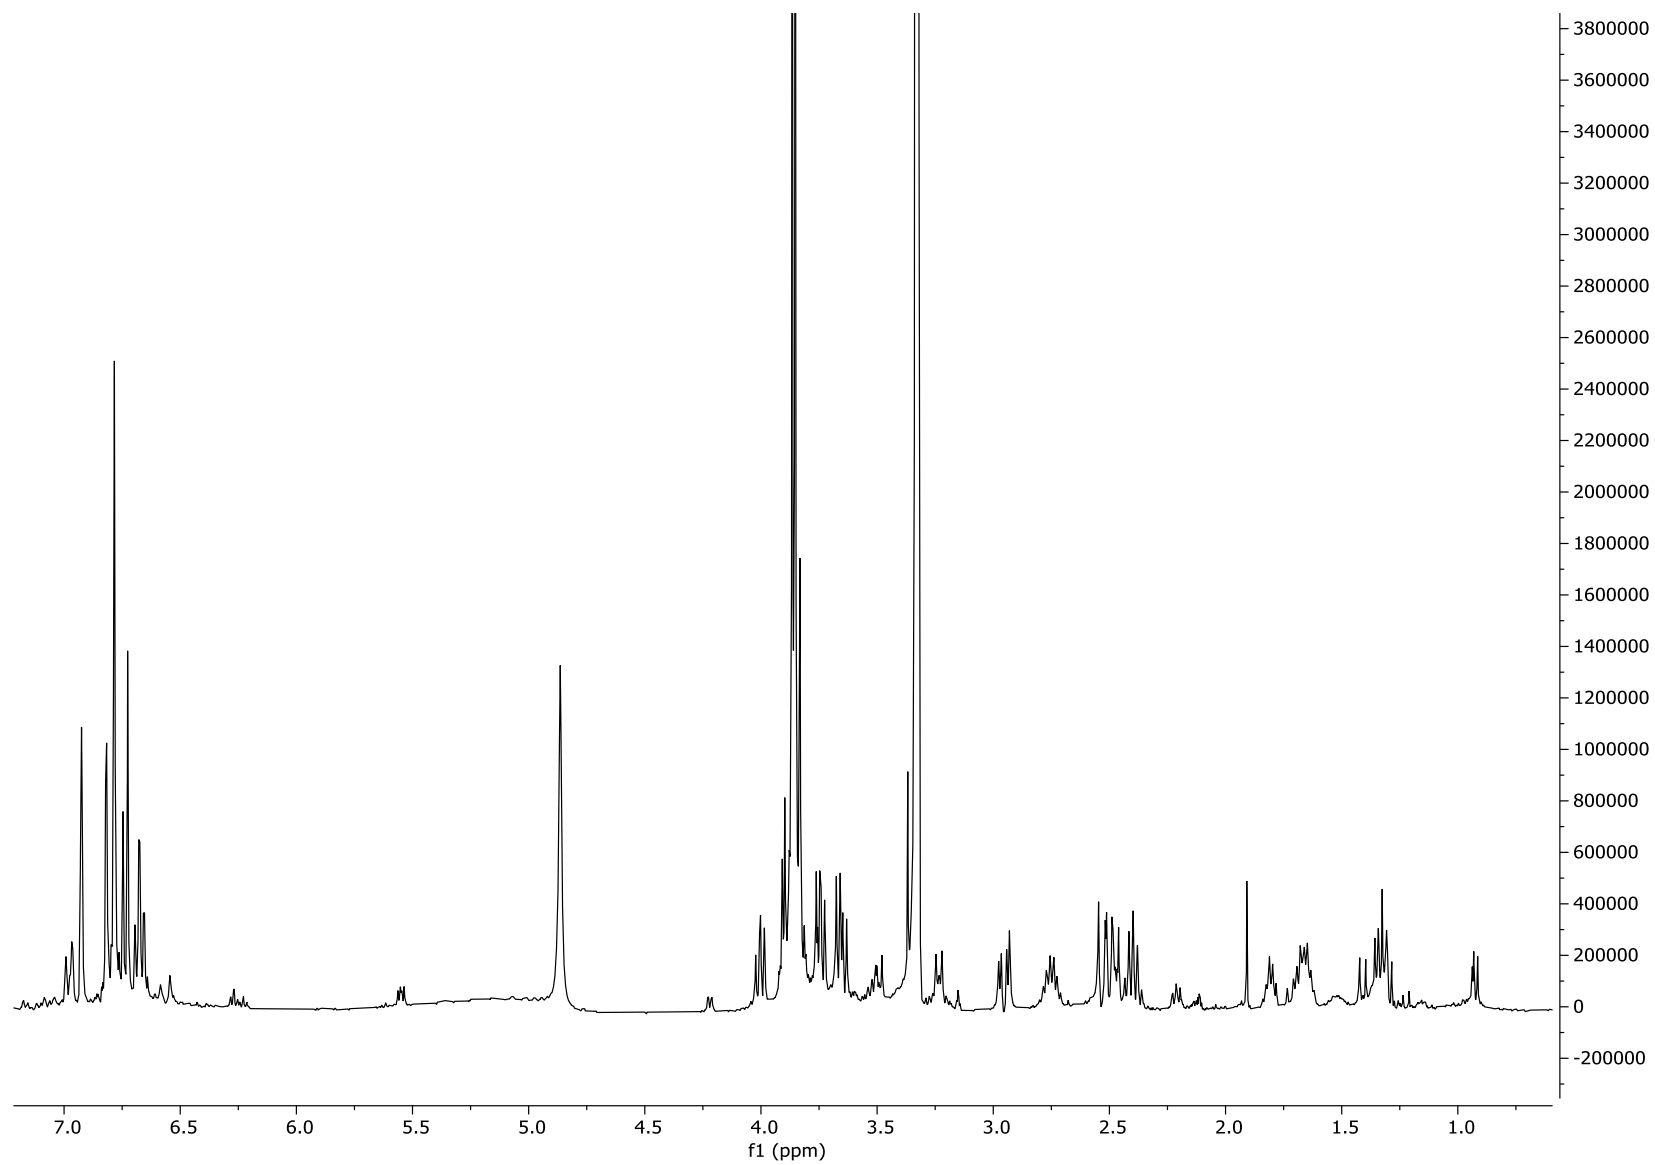

S25. HSQC (600 MHz, CD<sub>3</sub>OD) of (+)-lariciresinol (9).

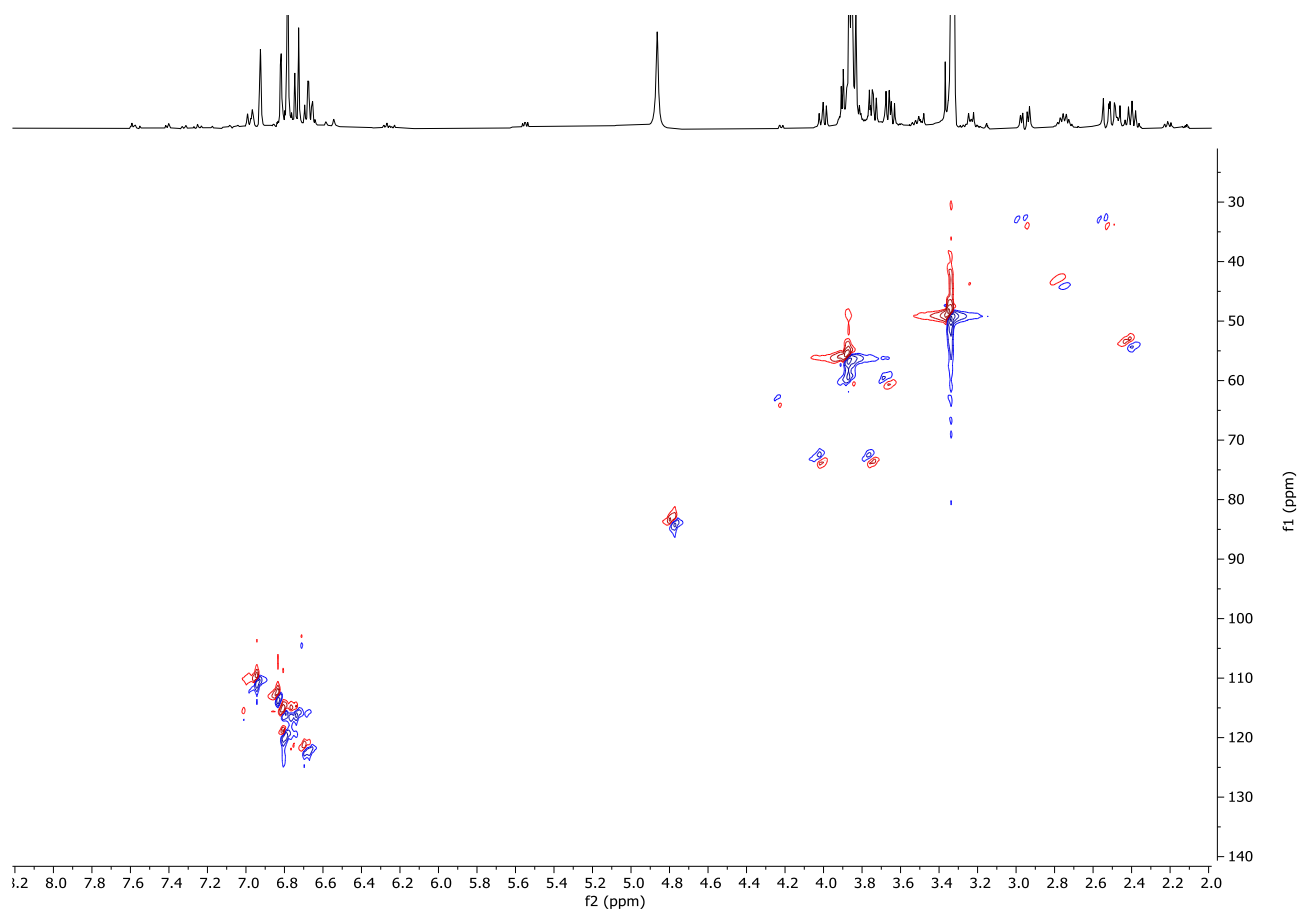

S26.  $^1\text{H}$  NMR (600 MHz,  $\text{CD}_3\text{OD}$ ) of *americanol A* (**10**).

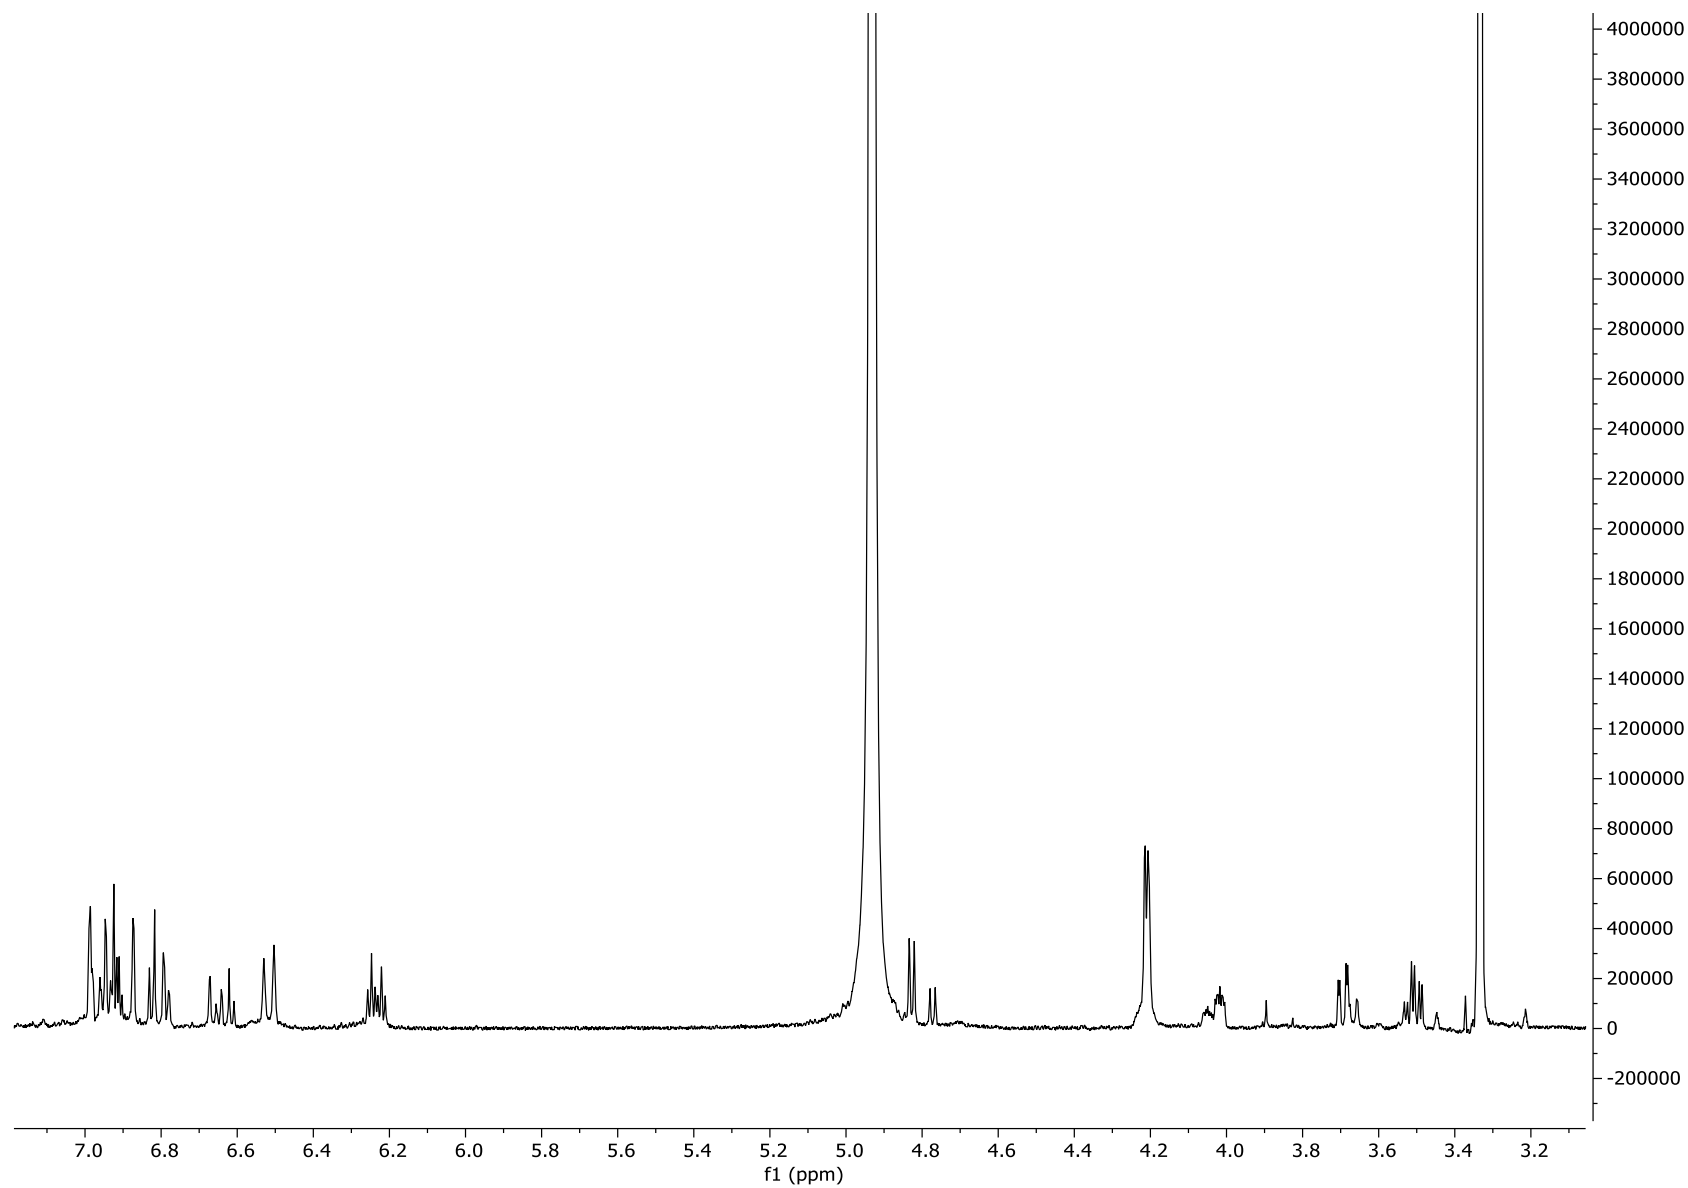

S27. HSQC (600 MHz, CD<sub>3</sub>OD) of *americanol A* (**10**).

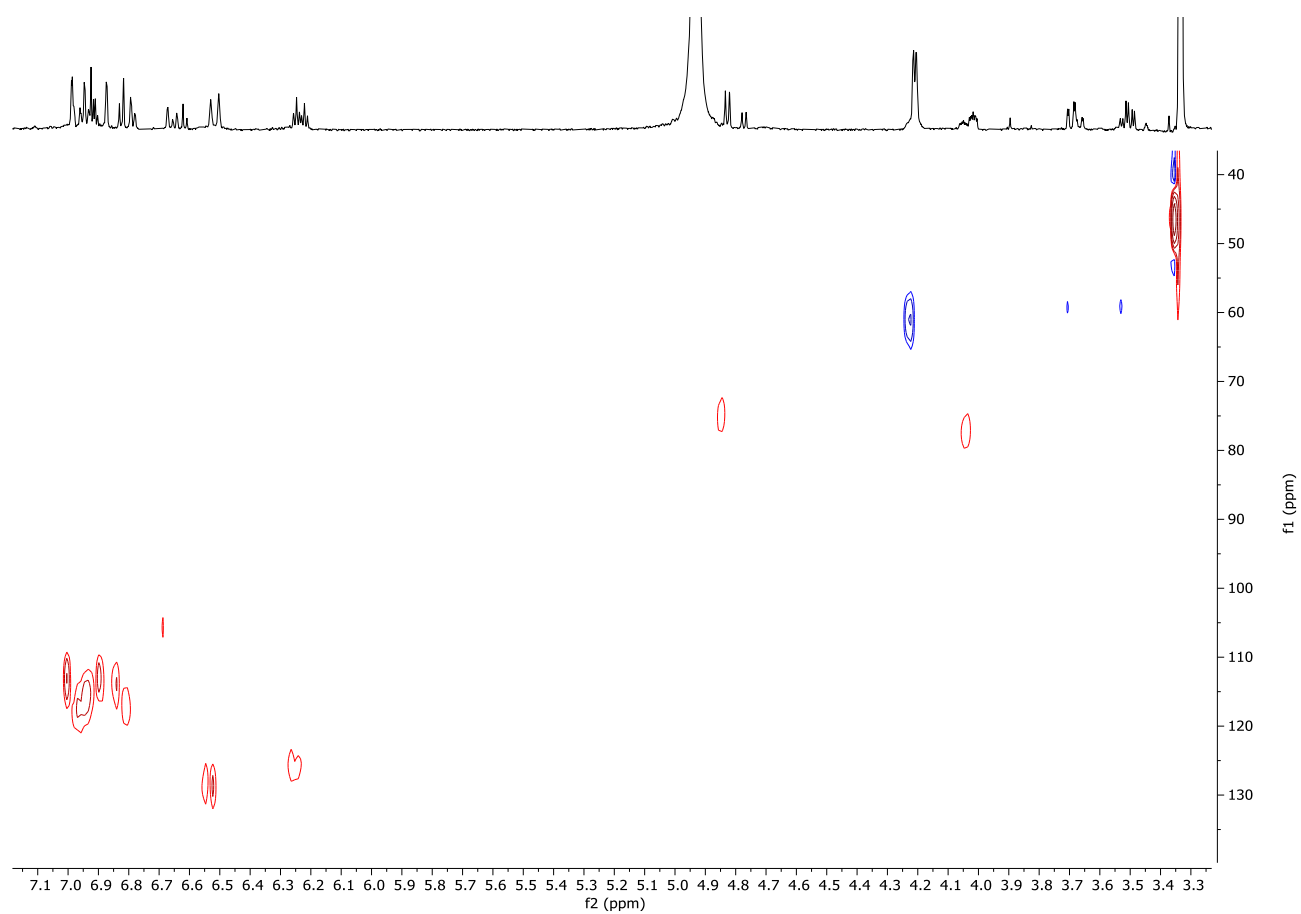

S28. HMBC (600 MHz, CD<sub>3</sub>OD) of *americanol* A (**10**).

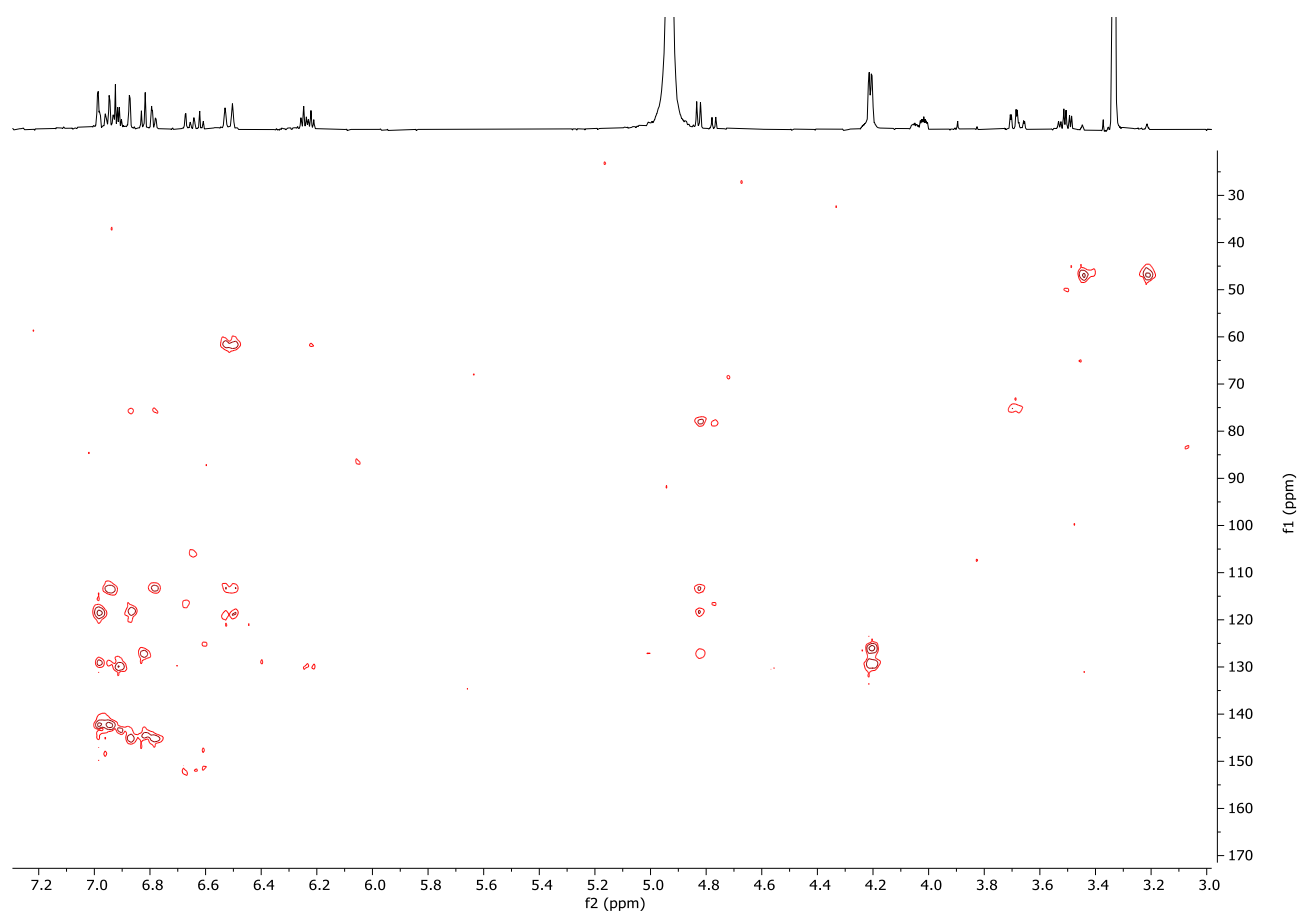

Supplement: s1 [file s1]
